# Supplementary material for: Identification of Fungicide Combinations Targeting Plasmopara viticola and Botrytis cinerea Fungicide Resistance Using Machine Learning
Source: MDPI journal article supplement (doi:10.3390/microorganisms11051341), 2023-05-19
Supplement: s1 [file s1]

Supplementary Data

**Table S1.** Compound Information for all the fungicides.

| Compound # | Structure                                                                           | Name           |
|------------|-------------------------------------------------------------------------------------|----------------|
| 1          | 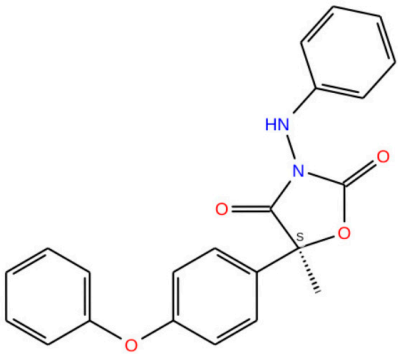   | Famoxadone     |
| 2          |   | Azoxystrobin   |
| 3          |  | Fenamidone     |
| 4          |  | Coumoxystrobin |

|   |                                                                                                                                                                                                                                                                                                                                                                                                                                                                                                         |                  |
|---|---------------------------------------------------------------------------------------------------------------------------------------------------------------------------------------------------------------------------------------------------------------------------------------------------------------------------------------------------------------------------------------------------------------------------------------------------------------------------------------------------------|------------------|
| 5 | 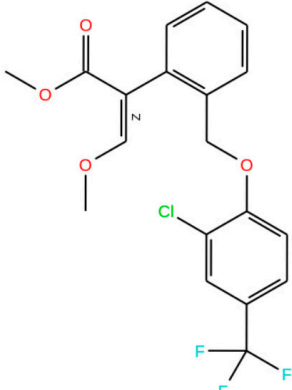 <p>The chemical structure of Flufenoxystrobin features a central pyrazole ring. One pyrazole nitrogen is substituted with a 4-(trifluoromethyl)phenoxy group, where the trifluoromethyl group is highlighted in cyan. The other pyrazole nitrogen is substituted with a 2-(4-methoxybenzyloxy)phenyl group. The 2-position of the phenyl ring is also substituted with a (E)-2-methoxy-3-oxoprop-1-en-1-yl group.</p> | Flufenoxystrobin |
| 6 |  <p>The chemical structure of Enoxastrobin consists of a pyrazole ring. One nitrogen is substituted with a 4-(4-chlorophenyl)-2-methoxy-3-oxoprop-1-en-1-yl group, with the chlorine atom highlighted in green. The other nitrogen is substituted with a 2-((E)-2-methoxy-3-oxoprop-1-en-1-yloxy)phenyl group.</p>                                                                                                    | Enoxastrobin     |
| 7 |  <p>The chemical structure of Pyraoxystrobin features a pyrazole ring. One nitrogen is substituted with a 4-chlorophenyl group, with the chlorine atom highlighted in green. The other nitrogen is substituted with a 2-((E)-2-methoxy-3-oxoprop-1-en-1-yloxy)phenyl group. The 2-position of the phenyl ring is also substituted with a (E)-2-methoxy-3-oxoprop-1-en-1-yl group.</p>                                | Pyraoxystrobin   |
| 8 |  <p>The chemical structure of Picoxystrobin features a pyrazole ring. One nitrogen is substituted with a 4-(trifluoromethyl)phenoxy group, where the trifluoromethyl group is highlighted in cyan. The other nitrogen is substituted with a 2-((E)-2-methoxy-3-oxoprop-1-en-1-yloxy)phenyl group. The 2-position of the phenyl ring is also substituted with a (E)-2-methoxy-3-oxoprop-1-en-1-yl group.</p>          | Picoxystrobin    |

|    |                                                                                     |                 |
|----|-------------------------------------------------------------------------------------|-----------------|
| 9  | 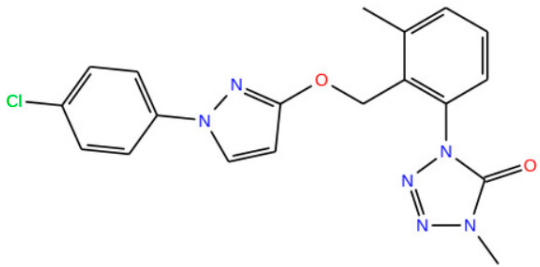   | Metyltetraprole |
| 10 |    | Fenaminstrobin  |
| 11 |   | Pyribencarb     |
| 12 |  | Dimoxystrobin   |
| 13 |  | Triclopyricarb  |

|    |                                                                                     |                 |
|----|-------------------------------------------------------------------------------------|-----------------|
| 14 | 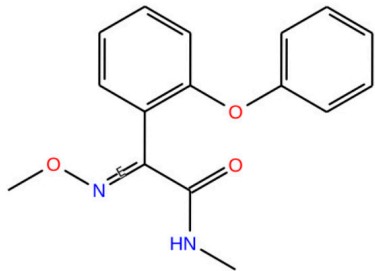   | Metominostrobin |
| 15 |    | Pyrametostrobin |
| 16 |   | Mandestrobin    |
| 17 |  | Fluoxastrobin   |



|    |                                                                                     |                |
|----|-------------------------------------------------------------------------------------|----------------|
| 18 | 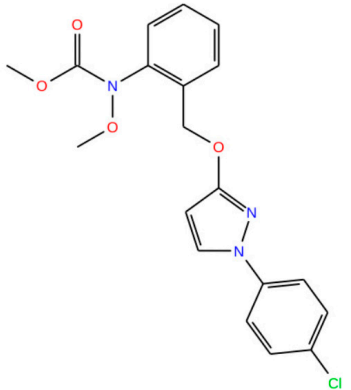   | Pyraclostrobin |
| 19 |    | Orysastrobins  |
| 20 |   | Folpet         |
| 21 |  | Ferbam         |
| 22 |  | Captan         |

|    |                                                                                     |              |
|----|-------------------------------------------------------------------------------------|--------------|
| 23 | 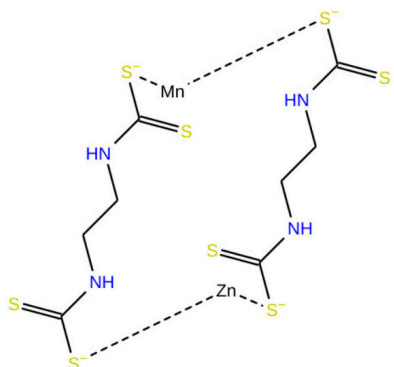   | Mancozeb     |
| 24 |    | Ametoctradin |
| 25 |   | Thiram       |
| 26 |  | Zineb        |
| 27 |  | Fluindapyr   |

|    |                                                                                     |                |
|----|-------------------------------------------------------------------------------------|----------------|
| 28 | 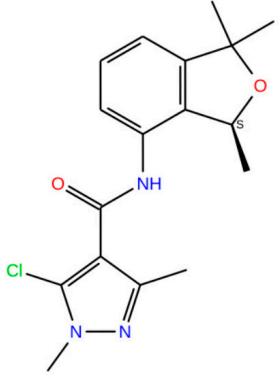   | Furametpyr     |
| 29 |   | Fenpropidin    |
| 30 |  | Fluoxapiprolin |
| 31 |  | Isoflucypram   |

|    |                                                                                     |               |
|----|-------------------------------------------------------------------------------------|---------------|
| 32 | 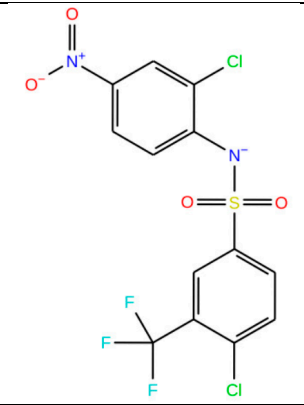   | Flusulfamide  |
| 33 |    | Zoxamide      |
| 34 |   | Tebufloquin   |
| 35 |  | Diethofencarb |
| 36 |  | Ethaboxam     |

|    |                                                                                     |                 |
|----|-------------------------------------------------------------------------------------|-----------------|
| 37 | 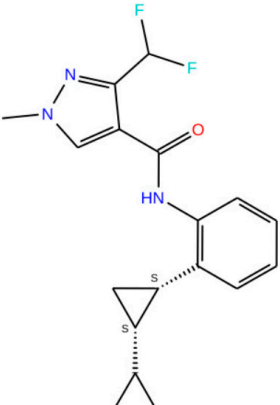   | Sedaxane        |
| 38 |    | Triazoxide      |
| 39 |   | Dichlobentiazox |
| 40 |  | Polyoxin        |

|    |                                                                                     |               |
|----|-------------------------------------------------------------------------------------|---------------|
| 41 | 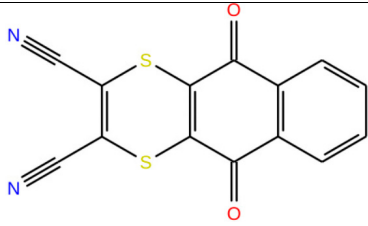   | Dithianon     |
| 42 |    | Inpyrfluxam   |
| 43 |   | Picarbutrazox |
| 44 |  | Iprodione     |
| 45 |  | Penconazole   |

|    |                                                                                     |               |
|----|-------------------------------------------------------------------------------------|---------------|
| 46 | 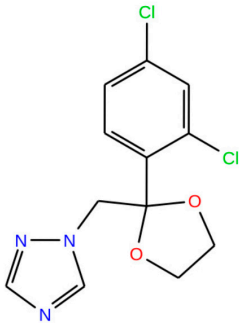   | Azaxonazole   |
| 47 |   | Penthioipyrad |
| 48 |  | Oxathiaprolin |
| 49 |  | Fenoxanil     |

|    |                                                                                     |              |
|----|-------------------------------------------------------------------------------------|--------------|
| 50 | 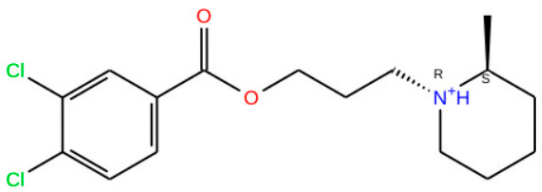   | Piperalin    |
| 51 |    | Diclomezine  |
| 52 |   | Ferimzone    |
| 53 |  | Cyflufenamid |



**Table S2.** Calculated binding affinity (via docking simulations) and predicted binding affinity between 19 selected ligands and G143A-mutated cytochrome b of *Botrytis cinerea* without a validation set.

| <b>Fungicide</b> | <b>Calculated Binding Affinity</b> | <b>Predicted Binding Affinity</b> |
|------------------|------------------------------------|-----------------------------------|
| Furametpyr       | -2.705                             | -7.218                            |
| Azaconazole      | -5.702                             | -7.084                            |
| Penthiopyrad     | -4.203                             | -6.899                            |
| Oxathiapiprolin  | -3.960                             | -6.481                            |
| Triazoxide       | -2.937                             | -6.233                            |
| Fenpropidin      | -4.878                             | -5.989                            |
| Fenoxanil        | -4.928                             | -5.862                            |
| Isoflucypram     | -5.261                             | -5.737                            |
| Ametoctradin     | -6.954                             | -5.485                            |
| Flusulfamide     | -5.418                             | -5.410                            |
| Polyoxin         | -4.119                             | -5.132                            |
| Diethofencarb    | -1.966                             | -4.710                            |
| Tebufluoquin     | -4.352                             | -4.359                            |
| Mandestrobin     | -8.690                             | -4.224                            |
| Picarbutrazox    | -0.453                             | -4.068                            |
| Famoxadone       | -8.765                             | -3.443                            |
| Iprodione        | -4.797                             | -3.353                            |
| Dithianon        | -2.515                             | -3.347                            |
| Metominostrobin  | -7.417                             | -2.032                            |

**Table S3.** Calculated binding affinity (via docking simulations) and predicted binding affinity between 19 selected ligands and G143A-mutated cytochrome b of *Botrytis cinerea* for QSAR model with a validation set.

| <b>Fungicide</b> | <b>Calculated Binding Affinity</b> | <b>Predicted Binding Affinity</b> |
|------------------|------------------------------------|-----------------------------------|
| Penthiopyrad     | -4.203                             | -6.652                            |
| Isoflucypram     | -5.261                             | -6.601                            |
| Oxathiapiprolin  | -3.960                             | -6.351                            |
| Azaconazole      | -5.702                             | -6.137                            |
| Furametpyr       | -2.705                             | -6.077                            |
| Flusulfamide     | -5.418                             | -5.391                            |
| Fenoxanil        | -4.928                             | -5.288                            |
| Triazoxide       | -2.937                             | -5.241                            |
| Fenpropidin      | -4.878                             | -5.115                            |
| Iprodione        | -4.797                             | -4.581                            |
| Tebufluoquin     | -4.352                             | -4.436                            |
| Ametoctradin     | -6.954                             | -4.396                            |
| Polyoxin         | -4.119                             | -4.141                            |
| Diethofencarb    | -1.966                             | -3.925                            |
| Famoxadone       | -8.765                             | -3.726                            |
| Picarbutrazox    | -0.453                             | -3.643                            |
| Dithianon        | -2.515                             | -3.639                            |
| Mandestrobin     | -8.690                             | -3.244                            |
| Metominostrobin  | -7.417                             | -1.958                            |

**Table S4.** Calculated binding affinity (via docking simulations) and predicted binding affinity between 17 selected ligands and G143A-mutated cytochrome b of *Plasmopara viticola* without a validation set.

| <b>Fungicide</b> | <b>Calculated Binding Affinity</b> | <b>Predicted Binding Affinity</b> |
|------------------|------------------------------------|-----------------------------------|
| Fluindapyr       | -5.424                             | -8.091                            |
| Furametpyr       | -4.667                             | -6.826                            |
| Fenpropidin      | -4.410                             | -6.714                            |
| Fluoxapiprolin   | -2.857                             | -6.600                            |
| Isoflucypram     | -1.367                             | -6.354                            |
| Flusulfamide     | -5.110                             | -5.920                            |
| Ametoctradin     | -6.299                             | -5.824                            |
| Tebufloquin      | 0                                  | -5.767                            |
| Diethofencarb    | -3.406                             | -5.649                            |
| Ethaboxam        | -5.662                             | -4.842                            |
| Famoxadone       | -6.238                             | -4.785                            |
| Triazoxide       | 0                                  | -4.617                            |
| Mandestrobin     | -7.393                             | -4.611                            |
| Polyoxin         | -3.621                             | -4.568                            |
| Dithianon        | 0                                  | -4.306                            |
| Dimoxystrobin    | -7.548                             | -4.034                            |
| Picarbutrazox    | -4.188                             | -2.413                            |

**Table S5.** Calculated binding affinity (via docking simulations) and predicted binding affinity between 17 selected ligands and G143A-mutated cytochrome b of *Plasmopara viticola* by using the QSAR model with a validation set.

| <b>Fungicide</b> | <b>Calculated Binding Affinity</b> | <b>Predicted Binding Affinity</b> |
|------------------|------------------------------------|-----------------------------------|
| Fluindapyr       | -5.424                             | -7.845                            |
| Furametpyr       | -4.667                             | -6.300                            |
| Flusulfamide     | -5.110                             | -6.275                            |
| Isoflucypram     | -1.367                             | -6.054                            |
| Fenpropidin      | -4.410                             | -5.903                            |
| Diethofencarb    | -3.406                             | -5.608                            |
| Tebufloquin      | 0                                  | -5.436                            |
| Fluoxapiprolin   | -2.857                             | -5.307                            |
| Triazoxide       | 0                                  | -4.943                            |
| Ametoctradin     | -6.299                             | -4.740                            |
| Ethaboxam        | -5.662                             | -4.672                            |
| Dithianon        | 0                                  | -4.287                            |
| Polyoxin         | -3.621                             | -4.257                            |
| Famoxadone       | -6.238                             | -4.117                            |
| Mandestrobin     | -7.393                             | -3.989                            |
| Dimoxystrobin    | -7.548                             | -3.157                            |
| Picarbutrazox    | -4.188                             | -2.351                            |

QSAR Data for Botrytis cinerea

| Model Report      |        |        |                |        |                |                                     |
|-------------------|--------|--------|----------------|--------|----------------|-------------------------------------|
| Model Code        | Score  | S.D.   | R <sup>2</sup> | RMSE   | Q <sup>2</sup> | Q <sup>2</sup> MW (Null Hypothesis) |
| pls_19            | 0.5892 | 2.1184 | 0.6378         | 2.1419 | 0.6172         | -0.0635                             |
| kpls_radial_19    | 0.5595 | 1.8525 | 0.7110         | 2.1152 | 0.6267         | -0.0635                             |
| kpls_dendritic_19 | 0.5593 | 1.6052 | 0.7830         | 2.0310 | 0.6558         | -0.0635                             |
| kpls_desc_19      | 0.5544 | 1.9419 | 0.6956         | 2.1414 | 0.6174         | -0.0635                             |
| kpls_linear_19    | 0.5219 | 1.6506 | 0.7706         | 2.1168 | 0.6261         | -0.0635                             |
| kpls_radial_39    | 0.4979 | 1.9519 | 0.6875         | 2.2512 | 0.5641         | -1.2909                             |
| kpls_dendritic_34 | 0.4899 | 1.7542 | 0.7610         | 2.1877 | 0.5655         | -0.5910                             |
| kpls_linear_34    | 0.4792 | 1.7329 | 0.7668         | 2.2016 | 0.5600         | -0.5910                             |
| kpls_radial_16    | 0.4760 | 1.9404 | 0.7073         | 2.2709 | 0.5352         | -1.2336                             |
| kpls_dendritic_44 | 0.4308 | 1.4941 | 0.8236         | 2.2315 | 0.5745         | 0.1264                              |

**Figure S1.** Top 10-ranked QSAR models without a validation set for (fungicides used in) *Botrytis cinerea*.

| b) Training Set               |                |         |                |                  | c) Training Set               |                |         |                |                  |
|-------------------------------|----------------|---------|----------------|------------------|-------------------------------|----------------|---------|----------------|------------------|
| S.D.                          | R <sup>2</sup> | RMSE    | Q <sup>2</sup> |                  | S.D.                          | R <sup>2</sup> | RMSE    | Q <sup>2</sup> |                  |
| 1.8525                        | 0.7110         | 2.1152  | 0.6267         |                  | 1.6052                        | 0.7830         | 2.0310  | 0.6558         |                  |
| Optimum number of factors = 1 |                |         |                |                  | Optimum number of factors = 1 |                |         |                |                  |
| ID Set                        | Y(Obs)         | Y(Pred) | Error          | Name             | ID Set                        | Y(Obs)         | Y(Pred) | Error          | Name             |
| 1 train                       | 0.0000         | -0.6358 | -0.6358        | Azoxystrobin     | 1 train                       | 0.0000         | -0.0943 | -0.0943        | Azoxystrobin     |
| 2 train                       | 0.0000         | -0.0303 | -0.0303        | Coumoxystrobin   | 2 train                       | 0.0000         | -0.1075 | -0.1075        | Coumoxystrobin   |
| 3 train                       | -4.2340        | -1.1916 | 3.0424         | Dimoxystrobin    | 3 train                       | -4.2340        | -1.6236 | 2.6104         | Dimoxystrobin    |
| 4 test                        | 0.0000         | -1.2766 | -1.2766        | Enoxastrobin     | 4 test                        | 0.0000         | -0.9813 | -0.9813        | Enoxastrobin     |
| 5 train                       | -5.9500        | -4.2829 | 1.6671         | Fenamidone       | 5 train                       | -5.9500        | -5.5197 | 0.4303         | Fenamidone       |
| 6 train                       | 0.0000         | -0.1511 | -0.1511        | Fenaminstrobin   | 6 train                       | 0.0000         | -0.6974 | -0.6974        | Fenaminstrobin   |
| 7 train                       | 0.0000         | -1.4393 | -1.4393        | Fluoxastrobin    | 7 train                       | 0.0000         | 0.3008  | 0.3008         | Fluoxastrobin    |
| 8 train                       | 0.0000         | -3.1365 | -3.1365        | Metyltetraprole  | 8 train                       | 0.0000         | -2.5778 | -2.5778        | Metyltetraprole  |
| 9 train                       | 0.0000         | 0.1815  | 0.1815         | Orysastrobin     | 9 train                       | 0.0000         | -0.1490 | -0.1490        | Orysastrobin     |
| 10 train                      | -8.2000        | -3.5157 | 4.6843         | Picoxystrobin    | 10 train                      | -8.2000        | -4.8191 | 3.3809         | Picoxystrobin    |
| 11 train                      | -3.4420        | -2.6442 | 0.7978         | Pyraclastrobin   | 11 train                      | -3.4420        | -2.6495 | 0.7925         | Pyraclastrobin   |
| 12 train                      | 0.0000         | -1.5631 | -1.5631        | pyrametostrobin  | 12 train                      | 0.0000         | -0.5525 | -0.5525        | pyrametostrobin  |
| 13 train                      | -4.7170        | -2.6272 | 2.0898         | Pyraoxystrobin   | 13 train                      | -4.7170        | -3.2325 | 1.4845         | Pyraoxystrobin   |
| 14 train                      | -8.4460        | -7.8597 | 0.5863         | Pyribencarb      | 14 train                      | -8.4460        | -8.6584 | -0.2124        | Pyribencarb      |
| 15 test                       | 0.0000         | -3.8050 | -3.8050        | Triclopyricarb   | 15 test                       | 0.0000         | -2.5071 | -2.5071        | Triclopyricarb   |
| 16 train                      | 0.0000         | -1.9058 | -1.9058        | Captan           | 16 train                      | 0.0000         | -1.8739 | -1.8739        | Captan           |
| 17 test                       | -3.1360        | -3.2042 | -0.0682        | Ferbam           | 17 test                       | -3.1360        | -3.2377 | -0.1017        | Ferbam           |
| 18 train                      | 0.0000         | -1.5244 | -1.5244        | Folpet           | 18 train                      | 0.0000         | -1.4578 | -1.4578        | Folpet           |
| 19 train                      | 0.0000         | -2.1791 | -2.1791        | Mancozeb         | 19 train                      | 0.0000         | -2.6136 | -2.6136        | Mancozeb         |
| 20 train                      | -4.9350        | -3.3297 | 1.6053         | Thiram           | 20 train                      | -4.9350        | -3.3862 | 1.5488         | Thiram           |
| 21 train                      | -2.4520        | -2.1791 | 0.2729         | Zineb            | 21 train                      | -2.4520        | -2.6136 | -0.1616        | Zineb            |
| 22 train                      | -7.2440        | -7.5121 | -0.2681        | Zoxamide         | 22 train                      | -7.2440        | -7.9947 | -0.7508        | Zoxamide         |
| 23 test                       | -9.2080        | -6.1196 | 3.0884         | Sedaxane         | 23 test                       | -9.2080        | -6.3464 | 2.8616         | Sedaxane         |
| 24 test                       | -8.9120        | -7.5089 | 1.4031         | Piperalin        | 24 test                       | -8.9120        | -6.1379 | 2.7741         | Piperalin        |
| 25 train                      | -6.2170        | -7.4936 | -1.2766        | Inpyrfluxam      | 25 train                      | -6.2170        | -8.4638 | -2.2468        | Inpyrfluxam      |
| 26 train                      | -8.8700        | -8.0283 | 0.8417         | Penconazole      | 26 train                      | -8.8700        | -7.7345 | 1.1355         | Penconazole      |
| 27 train                      | -6.0890        | -5.4897 | 0.5993         | Ferimzone        | 27 train                      | -6.0890        | -5.0672 | 1.0218         | Ferimzone        |
| 28 test                       | -7.3720        | -5.2805 | 2.0915         | Cyflufenamid     | 28 test                       | -7.3720        | -4.3515 | 3.0205         | Cyflufenamid     |
| 29 test                       | -6.6920        | -4.7438 | 1.9482         | Diclomazine      | 29 test                       | -6.6920        | -6.2629 | 0.4291         | Diclomazine      |
| 30 train                      | -7.2000        | -4.9348 | 2.2652         | Dichlobentiazox  | 30 train                      | -7.2000        | -4.3167 | 2.8833         | Dichlobentiazox  |
| 31 test                       | -6.0650        | -6.1073 | -0.0423        | Ethaboxam        | 31 test                       | -6.0650        | -5.3245 | 0.7405         | Ethaboxam        |
| 32 train                      | -6.7210        | -8.4611 | -1.7401        | Fluindapyr       | 32 train                      | -6.7210        | -7.8362 | -1.1152        | Fluindapyr       |
| 33 train                      | -6.8900        | -8.4643 | -1.5743        | Fluoxapiprolin   | 33 train                      | -6.8900        | -7.5913 | -0.7013        | Fluoxapiprolin   |
| 34 train                      | 0.0000         | -1.2093 | -1.2093        | Flufenoxystrobin | 34 train                      | 0.0000         | -0.2772 | -0.2772        | Flufenoxystrobin |

  

| d) Training Set               |                |         |                |                  | e) Training Set               |                |         |                |                  |
|-------------------------------|----------------|---------|----------------|------------------|-------------------------------|----------------|---------|----------------|------------------|
| S.D.                          | R <sup>2</sup> | RMSE    | Q <sup>2</sup> |                  | S.D.                          | R <sup>2</sup> | RMSE    | Q <sup>2</sup> |                  |
| 1.9419                        | 0.6956         | 2.1414  | 0.6174         |                  | 1.6506                        | 0.7706         | 2.1168  | 0.6261         |                  |
| Optimum number of factors = 2 |                |         |                |                  | Optimum number of factors = 1 |                |         |                |                  |
| ID Set                        | Y(Obs)         | Y(Pred) | Error          | Name             | ID Set                        | Y(Obs)         | Y(Pred) | Error          | Name             |
| 1 train                       | 0.0000         | -1.0399 | -1.0399        | Azoxystrobin     | 1 train                       | 0.0000         | -0.5586 | -0.5586        | Azoxystrobin     |
| 2 train                       | 0.0000         | -0.9394 | -0.9394        | Coumoxystrobin   | 2 train                       | 0.0000         | -0.0221 | -0.0221        | Coumoxystrobin   |
| 3 train                       | -4.2340        | -4.0657 | 0.1683         | Dimoxystrobin    | 3 train                       | -4.2340        | -1.5967 | 2.6373         | Dimoxystrobin    |
| 4 test                        | 0.0000         | -0.4840 | -0.4840        | Enoxastrobin     | 4 test                        | 0.0000         | -0.7957 | -0.7957        | Enoxastrobin     |
| 5 train                       | -5.9500        | -3.7535 | 2.1965         | Fenamidone       | 5 train                       | -5.9500        | -5.5331 | 0.4169         | Fenamidone       |
| 6 train                       | 0.0000         | 0.0520  | 0.0520         | Fenaminstrobin   | 6 train                       | 0.0000         | -0.5917 | -0.5917        | Fenaminstrobin   |
| 7 train                       | 0.0000         | 0.5181  | 0.5181         | Fluoxastrobin    | 7 train                       | 0.0000         | 0.0507  | 0.0507         | Fluoxastrobin    |
| 8 train                       | 0.0000         | -2.2374 | -2.2374        | Metyltetraprole  | 8 train                       | 0.0000         | -2.6519 | -2.6519        | Metyltetraprole  |
| 9 train                       | 0.0000         | -1.7786 | -1.7786        | Orysastrobin     | 9 train                       | 0.0000         | -0.1103 | -0.1103        | Orysastrobin     |
| 10 train                      | -8.2000        | -3.7445 | 4.4555         | Picoxystrobin    | 10 train                      | -8.2000        | -4.7253 | 3.4747         | Picoxystrobin    |
| 11 train                      | -3.4420        | -2.0358 | 1.4062         | Pyraclastrobin   | 11 train                      | -3.4420        | -2.5618 | 0.8802         | Pyraclastrobin   |
| 12 train                      | 0.0000         | -3.1445 | -3.1445        | pyrametostrobin  | 12 train                      | 0.0000         | -0.3595 | -0.3595        | pyrametostrobin  |
| 13 train                      | -4.7170        | -2.3666 | 2.3504         | Pyraoxystrobin   | 13 train                      | -4.7170        | -2.9254 | 1.7916         | Pyraoxystrobin   |
| 14 train                      | -8.4460        | -5.0040 | 3.4420         | Pyribencarb      | 14 train                      | -8.4460        | -8.3902 | 0.0558         | Pyribencarb      |
| 15 test                       | 0.0000         | -2.3964 | -2.3964        | Triclopyricarb   | 15 test                       | 0.0000         | -1.8684 | -1.8684        | Triclopyricarb   |
| 16 train                      | 0.0000         | 0.2969  | 0.2969         | Captan           | 16 train                      | 0.0000         | -1.8525 | -1.8525        | Captan           |
| 17 test                       | -3.1360        | -2.4665 | 0.6695         | Ferbam           | 17 test                       | -3.1360        | -3.0021 | 0.1339         | Ferbam           |
| 18 train                      | 0.0000         | 0.6486  | 0.6486         | Folpet           | 18 train                      | 0.0000         | -1.4263 | -1.4263        | Folpet           |
| 19 train                      | 0.0000         | -1.1119 | -1.1119        | Mancozeb         | 19 train                      | 0.0000         | -2.5984 | -2.5984        | Mancozeb         |
| 20 train                      | -4.9350        | -4.7803 | 0.1547         | Thiram           | 20 train                      | -4.9350        | -3.3742 | 1.5608         | Thiram           |
| 21 train                      | -2.4520        | -4.1275 | -1.6755        | Zineb            | 21 train                      | -2.4520        | -2.5984 | -0.1464        | Zineb            |
| 22 train                      | -7.2440        | -6.9948 | 0.2492         | Zoxamide         | 22 train                      | -7.2440        | -7.9683 | -0.7243        | Zoxamide         |
| 23 test                       | -9.2080        | -7.7220 | 1.4860         | Sedaxane         | 23 test                       | -9.2080        | -6.3072 | 2.9008         | Sedaxane         |
| 24 test                       | -8.9120        | -7.0067 | 2.9053         | Piperalin        | 24 test                       | -8.9120        | -5.6680 | 3.2440         | Piperalin        |
| 25 train                      | -6.2170        | -7.8943 | -1.6773        | Inpyrfluxam      | 25 train                      | -6.2170        | -8.5667 | -2.3497        | Inpyrfluxam      |
| 26 train                      | -8.8700        | -8.8327 | 0.0373         | Penconazole      | 26 train                      | -8.8700        | -7.6174 | 1.2525         | Penconazole      |
| 27 train                      | -6.0890        | -8.0451 | -1.9561        | Ferimzone        | 27 train                      | -6.0890        | -5.0843 | 1.0047         | Ferimzone        |
| 28 test                       | -7.3720        | -2.9784 | 4.3936         | Cyflufenamid     | 28 test                       | -7.3720        | -4.1967 | 3.1753         | Cyflufenamid     |
| 29 test                       | -6.6920        | -6.4725 | 0.2195         | Diclomazine      | 29 test                       | -6.6920        | -6.1556 | 0.5364         | Diclomazine      |
| 30 train                      | -7.2000        | -5.3815 | 1.8185         | Dichlobentiazox  | 30 train                      | -7.2000        | -4.2869 | 2.9131         | Dichlobentiazox  |
| 31 test                       | -6.0650        | -6.5723 | -0.5073        | Ethaboxam        | 31 test                       | -6.0650        | -4.5171 | 1.5479         | Ethaboxam        |
| 32 train                      | -6.7210        | -7.4851 | -0.7641        | Fluindapyr       | 32 train                      | -6.7210        | -7.9302 | -1.2092        | Fluindapyr       |
| 33 train                      | -6.8900        | -5.8729 | 1.0171         | Fluoxapiprolin   | 33 train                      | -6.8900        | -7.8001 | -0.9101        | Fluoxapiprolin   |
| 34 train                      | 0.0000         | -2.4866 | -2.4866        | Flufenoxystrobin | 34 train                      | 0.0000         | -0.5271 | -0.5271        | Flufenoxystrobin |

**Figure S2.** Model reports for a) refer to the main paper, b) *kpls\_radial\_19*, c) *kpls\_dendritic\_19*, d) *kpls\_desc\_19*, and e) *kpls\_linear\_19* models of *Botrytis cinerea* without using validation set.

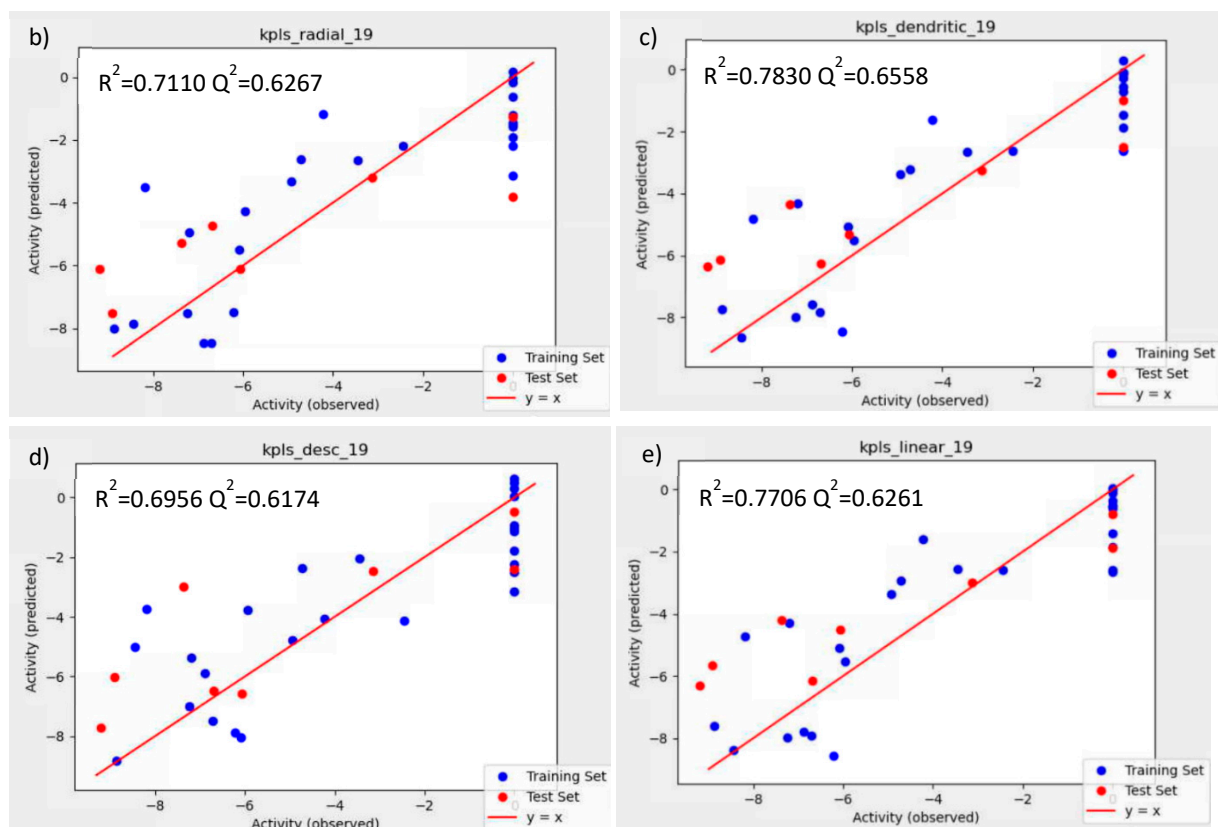

**Figure S3.** Scatter plot about performance for b) kpls\_radial\_19, c) kpls\_dendritic\_19, d) kpls\_desc\_19, and e) kpls\_linear\_19 models of *Botrytis cinerea* without using validation set.

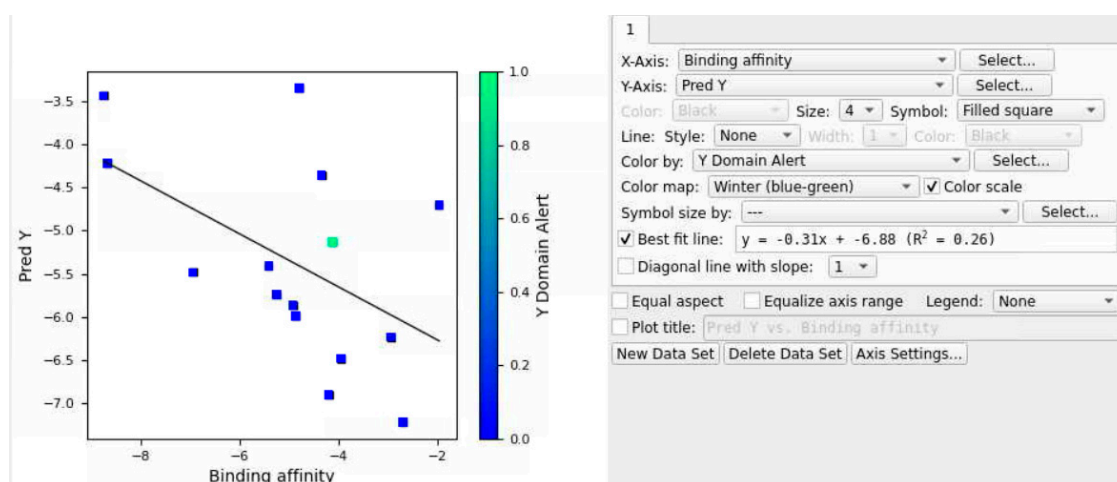

**Figure S4.** Scatter plot of external validation set after removing four outliers in Figure 10 (c).



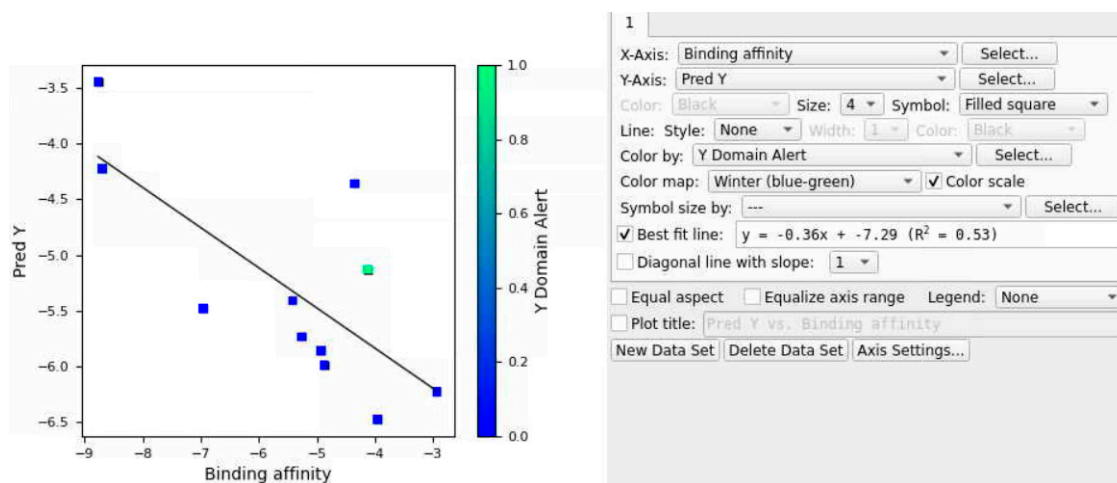

**Figure S5.** Scatter plot of external validation set after removing four outliers in Figure S4.

Model Report

| Model Code         | Score  | S.D.   | R <sup>2</sup> | RMSE   | Q <sup>2</sup> | Q <sup>2</sup> MW (Null Hypothesis) |
|--------------------|--------|--------|----------------|--------|----------------|-------------------------------------|
| kpls_molprint2D_39 | 0.6582 | 1.8732 | 0.7081         | 1.8919 | 0.6860         | 0.1725                              |
| kpls_radial_8      | 0.6570 | 1.8034 | 0.7316         | 1.8652 | 0.6865         | -0.5827                             |
| kpls_linear_30     | 0.6218 | 1.9272 | 0.7152         | 1.9482 | 0.5546         | -1.5647                             |
| kpls_dendritic_30  | 0.6068 | 1.8913 | 0.7258         | 1.9626 | 0.5480         | -1.5647                             |
| kpls_dendritic_39  | 0.5888 | 1.4775 | 0.8184         | 1.8814 | 0.6894         | 0.1725                              |
| kpls_linear_39     | 0.5818 | 1.4847 | 0.8167         | 1.8971 | 0.6842         | 0.1725                              |
| kpls_linear_40     | 0.5717 | 1.6210 | 0.7815         | 1.9602 | 0.6613         | 0.1650                              |
| kpls_radial_39     | 0.5714 | 1.6681 | 0.7686         | 1.9765 | 0.6573         | 0.1725                              |
| kpls_radial_30     | 0.5322 | 1.9012 | 0.7229         | 2.0992 | 0.4829         | -1.5647                             |
| kpls_molprint2D_40 | 0.5297 | 1.9253 | 0.6918         | 2.1363 | 0.5977         | 0.1650                              |

**Figure S6.** Top 10-ranked QSAR model reports with validation sets for *Botrytis cinerea*.

|                               |              |                  |          |                |
|-------------------------------|--------------|------------------|----------|----------------|
| b)                            | Training Set |                  | Test Set |                |
|                               | S.D.         | R <sup>2</sup>   | RMSE     | Q <sup>2</sup> |
|                               | 1.0034       | 0.7316           | 1.8652   | 0.6865         |
| Optimum number of factors = 1 |              |                  |          |                |
| ID                            | Set          | Y(Obs)           | Y(Pred)  | Error          |
| 1                             | train        | 0.0000           | -0.3619  | -0.3619        |
| 2                             | train        | 0.0000           | 0.1319   | 0.1319         |
| 3                             | train        | -4.2340          | -1.1572  | 3.0768         |
| 4                             | train        | 0.0000           | 0.4464   | 0.4464         |
| 5                             | test         | -5.9500          | -3.6137  | 2.3363         |
| 6                             | test         | 0.0000           | -0.4535  | -0.4535        |
| 7                             | train        | 0.0000           | -2.1305  | -2.1305        |
| 8                             | train        | 0.0000           | -2.9093  | -2.9093        |
| 9                             | train        | 0.0000           | 0.4589   | 0.4589         |
| 10                            | test         | -3.4420          | -1.4727  | 1.9693         |
| 11                            | train        | 0.0000           | -1.6323  | -1.6323        |
| 12                            | train        | -4.7170          | -1.8294  | 2.8876         |
| 13                            | test         | 0.0000           | -2.5428  | -2.5428        |
| 14                            | train        | 0.0000           | -2.2462  | -2.2462        |
| 15                            | train        | -3.1360          | -3.0359  | 0.1001         |
| 16                            | train        | 0.0000           | -1.9878  | -1.9878        |
| 17                            | train        | 0.0000           | -2.2509  | -2.2509        |
| 18                            | train        | -4.9350          | -3.2755  | 1.6595         |
| 19                            | train        | -2.4520          | -2.2509  | 0.2011         |
| 20                            | train        | -7.2440          | -7.2460  | -0.0020        |
| 21                            | train        | -9.2080          | -7.9810  | 1.2270         |
| 22                            | test         | -8.9120          | -6.2117  | 2.7003         |
| 23                            | train        | -6.2170          | -7.6173  | -1.4003        |
| 24                            | train        | -8.8700          | -8.4120  | 0.4580         |
| 25                            | train        | -6.0890          | -3.8953  | 2.1937         |
| 26                            | train        | -7.3720          | -6.5400  | 0.8320         |
| 27                            | train        | -6.6920          | -6.5711  | 0.1209         |
| 28                            | train        | -7.2000          | -4.3108  | 2.8892         |
| 29                            | test         | -6.0650          | -4.8418  | 1.2232         |
| 30                            | train        | -6.7210          | -8.4829  | -1.7619        |
| 31                            | test         | -6.8900          | -6.2315  | 0.6585         |
| 32                            | test         | 0.0000           | -1.6132  | -1.6132        |
|                               |              |                  |          |                |
|                               |              | Name             |          |                |
|                               |              | Azoxystrobin     |          |                |
|                               |              | Coumoxystrobin   |          |                |
|                               |              | Dimoxystrobin    |          |                |
|                               |              | Enoxastrobin     |          |                |
|                               |              | Fenamidone       |          |                |
|                               |              | Fenaministrobin  |          |                |
|                               |              | Fluoxastrobin    |          |                |
|                               |              | Metiltetraprole  |          |                |
|                               |              | Orysastrobin     |          |                |
|                               |              | Pyraclostrobin   |          |                |
|                               |              | pyrametostrobin  |          |                |
|                               |              | Pyraoxystrobin   |          |                |
|                               |              | Triclopypiricarb |          |                |
|                               |              | Captan           |          |                |
|                               |              | Ferbam           |          |                |
|                               |              | Folpet           |          |                |
|                               |              | Mancozeb         |          |                |
|                               |              | Thiram           |          |                |
|                               |              | Zineb            |          |                |
|                               |              | Zoxamide         |          |                |
|                               |              | Sedaxane         |          |                |
|                               |              | Piperalin        |          |                |
|                               |              | Inpyrfluxam      |          |                |
|                               |              | Penconazole      |          |                |
|                               |              | Ferimzone        |          |                |
|                               |              | Cyflufenamid     |          |                |
|                               |              | Diclomazine      |          |                |
|                               |              | Dichlobentiazox  |          |                |
|                               |              | Ethaboxam        |          |                |
|                               |              | Fluindapyr       |          |                |
|                               |              | Fluoxapiprolin   |          |                |
|                               |              | Flufenoxystrobin |          |                |
| c)                            | Training Set |                  | Test Set |                |
|                               | S.D.         | R <sup>2</sup>   | RMSE     | Q <sup>2</sup> |
|                               | 1.9272       | 0.7152           | 1.9482   | 0.5546         |
| Optimum number of factors = 1 |              |                  |          |                |
| ID                            | Set          | Y(Obs)           | Y(Pred)  | Error          |
| 1                             | train        | 0.0000           | -0.8721  | -0.8721        |
| 2                             | train        | 0.0000           | 0.1781   | 0.1781         |
| 3                             | train        | -4.2340          | -0.9975  | 3.2365         |
| 4                             | test         | 0.0000           | -0.8473  | -0.8473        |
| 5                             | test         | -5.9500          | -3.8890  | 2.0610         |
| 6                             | train        | 0.0000           | -0.4923  | -0.4923        |
| 7                             | train        | 0.0000           | -0.6838  | -0.6838        |
| 8                             | train        | 0.0000           | -1.8774  | -1.8774        |
| 9                             | train        | 0.0000           | -0.5887  | -0.5887        |
| 10                            | test         | -3.4420          | -1.4680  | 1.9740         |
| 11                            | train        | 0.0000           | -1.0506  | -1.0506        |
| 12                            | train        | -4.7170          | -1.7187  | 2.9983         |
| 13                            | test         | 0.0000           | -1.5683  | -1.5683        |
| 14                            | train        | 0.0000           | -3.6663  | -3.6663        |
| 15                            | test         | -3.1360          | -3.8378  | -0.7018        |
| 16                            | test         | 0.0000           | -3.4565  | -3.4565        |
| 17                            | train        | 0.0000           | -3.6698  | -3.6698        |
| 18                            | train        | -4.9350          | -3.8476  | 1.0874         |
| 19                            | train        | -2.4520          | -3.6698  | -1.2178        |
| 20                            | test         | -7.2440          | -5.4511  | 1.7929         |
| 21                            | train        | -9.2080          | -9.0403  | 0.1677         |
| 22                            | train        | -8.9120          | -7.2627  | 1.6493         |
| 23                            | train        | -6.2170          | -7.9913  | -1.7743        |
| 24                            | train        | -8.8700          | -8.1030  | 0.7670         |
| 25                            | train        | -6.0890          | -4.0332  | 2.0558         |
| 26                            | train        | -7.3720          | -6.5853  | 0.7867         |
| 27                            | train        | -6.6920          | -5.4836  | 1.2084         |
| 28                            | train        | -7.2000          | -3.9691  | 3.2309         |
| 29                            | train        | -6.0650          | -5.8516  | 0.2134         |
| 30                            | train        | -6.7210          | -8.4304  | -1.7094        |
| 31                            | test         | -6.8900          | -5.0497  | 1.8403         |
| 32                            | train        | 0.0000           | 0.0230   | 0.0230         |
| d)                            | Training Set |                  | Test Set |                |
|                               | S.D.         | R <sup>2</sup>   | RMSE     | Q <sup>2</sup> |
|                               | 1.8913       | 0.7258           | 1.9626   | 0.5480         |
| Optimum number of factors = 1 |              |                  |          |                |
| ID                            | Set          | Y(Obs)           | Y(Pred)  | Error          |
| 1                             | train        | 0.0000           | -0.5673  | -0.5673        |
| 2                             | train        | 0.0000           | 0.2340   | 0.2340         |
| 3                             | train        | -4.2340          | -1.1062  | 3.1278         |
| 4                             | test         | 0.0000           | -0.7538  | -0.7538        |
| 5                             | test         | -5.9500          | -3.9903  | 1.9597         |
| 6                             | train        | 0.0000           | -0.5506  | -0.5506        |
| 7                             | train        | 0.0000           | -0.5588  | -0.5588        |
| 8                             | train        | 0.0000           | -1.7685  | -1.7685        |
| 9                             | train        | 0.0000           | -0.6863  | -0.6863        |
| 10                            | test         | -3.4420          | -1.4775  | 1.9645         |
| 11                            | train        | 0.0000           | -1.1330  | -1.1330        |
| 12                            | train        | -4.7170          | -1.9138  | 2.8032         |
| 13                            | test         | 0.0000           | -1.7893  | -1.7893        |
| 14                            | train        | 0.0000           | -3.6356  | -3.6356        |
| 15                            | test         | -3.1360          | -3.8285  | -0.6925        |
| 16                            | test         | 0.0000           | -3.4606  | -3.4606        |
| 17                            | train        | 0.0000           | -3.6513  | -3.6513        |
| 18                            | train        | -4.9350          | -3.8358  | 1.0992         |
| 19                            | train        | -2.4520          | -3.6513  | -1.1993        |
| 20                            | test         | -7.2440          | -5.4857  | 1.7583         |
| 21                            | train        | -9.2080          | -9.0287  | 0.1793         |
| 22                            | train        | -8.9120          | -7.2815  | 1.6305         |
| 23                            | train        | -6.2170          | -8.0864  | -1.8694        |
| 24                            | train        | -8.8700          | -8.0876  | 0.7824         |
| 25                            | train        | -6.0890          | -4.0518  | 2.0372         |
| 26                            | train        | -7.3720          | -6.6783  | 0.6937         |
| 27                            | train        | -6.6920          | -5.5091  | 1.1829         |
| 28                            | train        | -7.2000          | -3.9972  | 3.2028         |
| 29                            | train        | -6.0650          | -5.8889  | 0.1761         |
| 30                            | train        | -6.7210          | -8.4055  | -1.6845        |
| 31                            | test         | -6.8900          | -4.9407  | 1.9493         |
| 32                            | train        | 0.0000           | 0.1555   | 0.1555         |
| e)                            | Training Set |                  | Test Set |                |
|                               | S.D.         | R <sup>2</sup>   | RMSE     | Q <sup>2</sup> |
|                               | 1.4775       | 0.8184           | 1.8814   | 0.6894         |
| Optimum number of factors = 1 |              |                  |          |                |
| ID                            | Set          | Y(Obs)           | Y(Pred)  | Error          |
| 1                             | train        | 0.0000           | 0.1536   | 0.1536         |
| 2                             | train        | 0.0000           | -0.5037  | -0.5037        |
| 3                             | train        | -4.2340          | -2.1713  | 2.0627         |
| 4                             | test         | 0.0000           | -1.3947  | -1.3947        |
| 5                             | train        | -5.9500          | -4.5512  | 1.3988         |
| 6                             | train        | 0.0000           | -1.4053  | -1.4053        |
| 7                             | train        | 0.0000           | -0.6754  | -0.6754        |
| 8                             | train        | 0.0000           | -1.3153  | -1.3153        |
| 9                             | test         | 0.0000           | -1.6255  | -1.6255        |
| 10                            | train        | -3.4420          | -0.7807  | 2.6613         |
| 11                            | train        | 0.0000           | -0.1521  | -0.1521        |
| 12                            | train        | -4.7170          | -2.3859  | 2.3311         |
| 13                            | train        | 0.0000           | -0.5293  | -0.5293        |
| 14                            | train        | 0.0000           | -2.0738  | -2.0738        |
| 15                            | test         | -3.1360          | -2.3349  | 0.8011         |
| 16                            | train        | 0.0000           | -1.5521  | -1.5521        |
| 17                            | train        | 0.0000           | -2.3314  | -2.3314        |
| 18                            | test         | -4.9350          | -2.2346  | 2.7004         |
| 19                            | train        | -2.4520          | -2.3314  | 0.1206         |
| 20                            | train        | -7.2440          | -7.7730  | -0.5290        |
| 21                            | test         | -9.2080          | -6.0367  | 3.1713         |
| 22                            | train        | -8.9120          | -9.3382  | -0.4262        |
| 23                            | train        | -6.2170          | -7.1219  | -0.9049        |
| 24                            | train        | -8.8700          | -9.3681  | -0.4981        |
| 25                            | train        | -6.0890          | -4.2110  | 1.8780         |
| 26                            | train        | -7.3720          | -6.9636  | 0.4084         |
| 27                            | test         | -6.6920          | -5.5961  | 1.0959         |
| 28                            | train        | -7.2000          | -4.6213  | 2.5787         |
| 29                            | train        | -6.0650          | -6.0380  | 0.0270         |
| 30                            | test         | -6.7210          | -7.0542  | -0.3332        |
| 31                            | train        | -6.8900          | -7.6135  | -0.7235        |
| 32                            | test         | 0.0000           | -2.1040  | -2.1040        |

**Figure S7.** Model reports for a) refer to the main paper, b) kpls\_radial\_19, c) kpls\_dendritic\_19, d) kpls\_desc\_19 and e) kpls\_linear\_19 models of *Botrytis cinerea* using validation set.

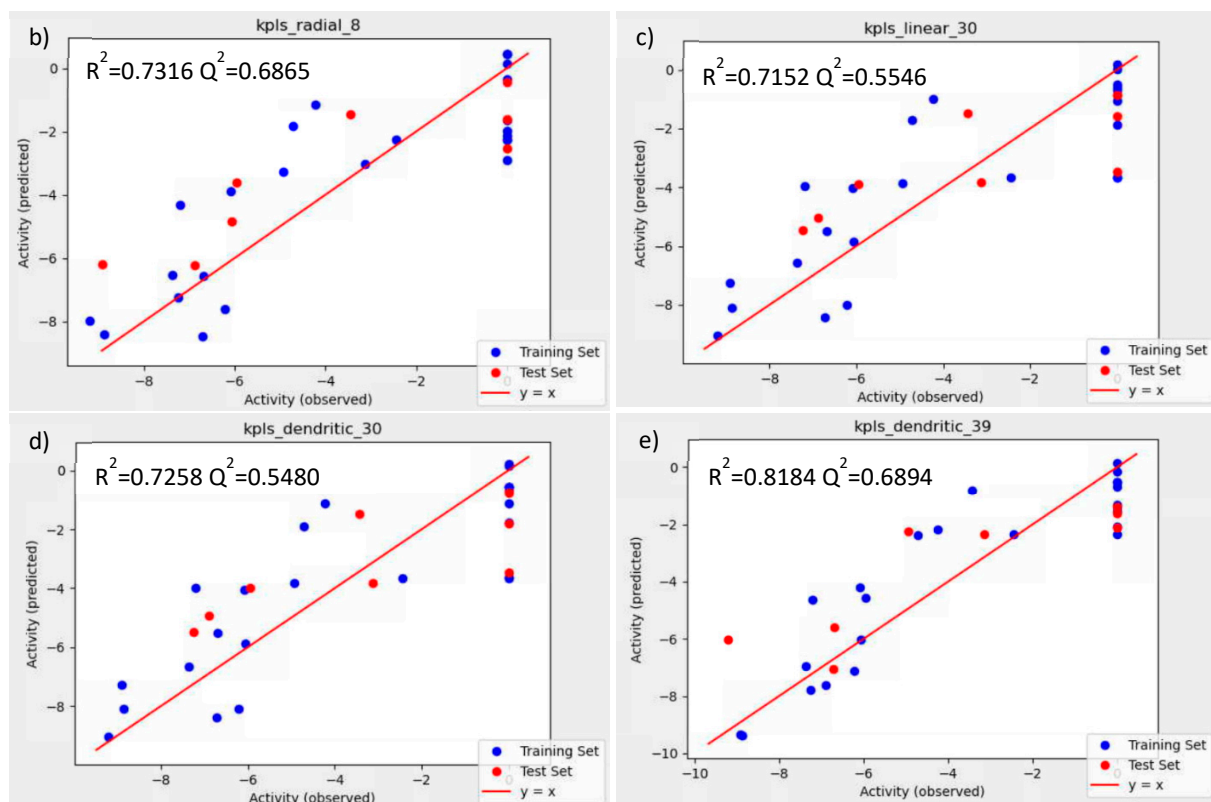

**Figure S8.** Scatter plot about performance for a) refer to the main paper, b) kpls\_radial\_8, c) kpls\_linear\_30, d) kpls\_dendritic\_30 and e) kpls\_dendritic\_39 models of *Botrytis cinerea* using validation set.

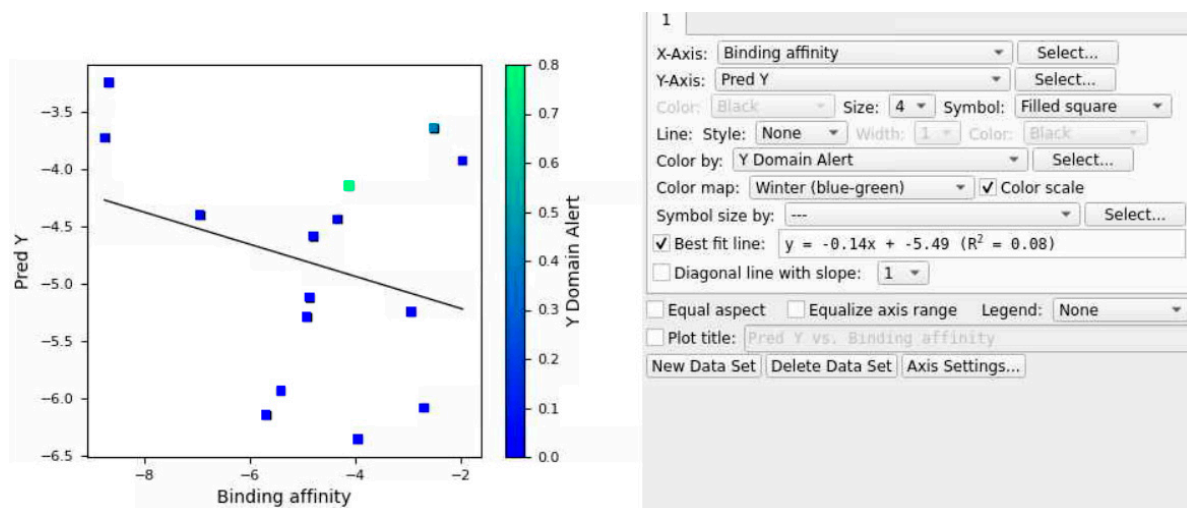

**Figure S9.** Scatter plot of external validation set after removing four outliers in Figure 11 (c).



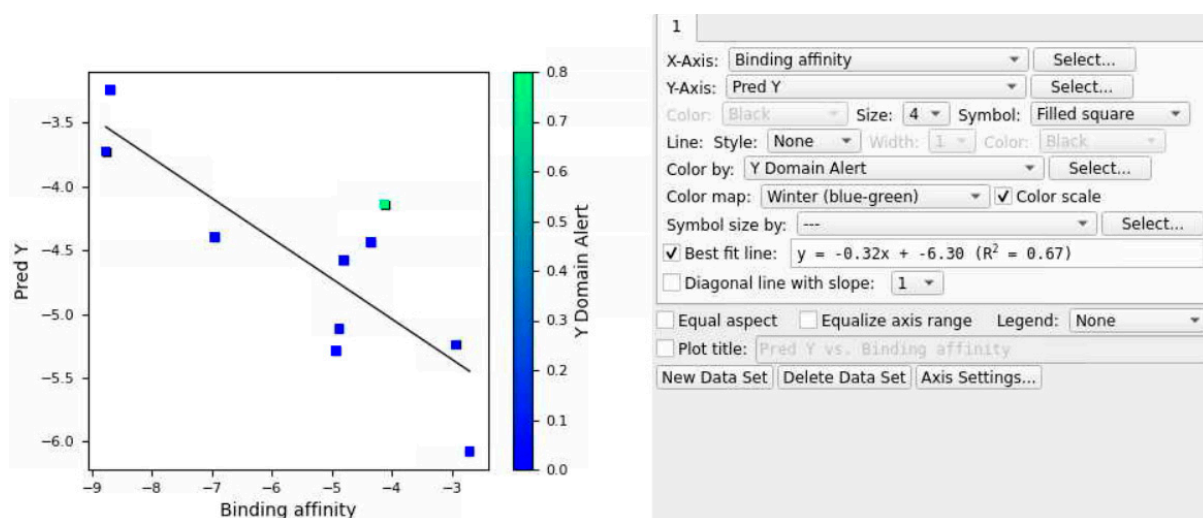

**Figure S10.** Scatter plot of external validation set after removing five outliers in Figure S9.

QSAR data for *Plasmopara viticola*:

| Model Report      |        |        |                |        |                |                                     |
|-------------------|--------|--------|----------------|--------|----------------|-------------------------------------|
| Model Code        | Score  | S.D.   | R <sup>2</sup> | RMSE   | Q <sup>2</sup> | Q <sup>2</sup> MW (Null Hypothesis) |
| kpls_desc_2       | 0.7116 | 1.7498 | 0.7032         | 1.5615 | 0.7350         | 0.0226                              |
| kpls_radial_24    | 0.6806 | 1.5607 | 0.7489         | 1.6354 | 0.7269         | 0.1147                              |
| kpls_linear_22    | 0.6640 | 1.4173 | 0.7931         | 1.6099 | 0.7343         | 0.1112                              |
| kpls_radial_22    | 0.6579 | 1.5606 | 0.7491         | 1.6732 | 0.7130         | 0.1112                              |
| pls_2             | 0.6420 | 1.9451 | 0.6333         | 1.7702 | 0.6594         | 0.0226                              |
| kpls_radial_45    | 0.6271 | 1.6222 | 0.7302         | 1.7455 | 0.6800         | 0.1223                              |
| kpls_dendritic_2  | 0.5756 | 1.5463 | 0.7586         | 1.7997 | 0.6480         | 0.0226                              |
| kpls_dendritic_22 | 0.5505 | 1.4107 | 0.7950         | 1.8023 | 0.6671         | 0.1112                              |
| kpls_linear_47    | 0.5471 | 1.4681 | 0.7821         | 1.8221 | 0.6422         | 0.0948                              |
| kpls_radial_47    | 0.5454 | 1.6214 | 0.7342         | 1.8747 | 0.6212         | 0.0948                              |

**Figure S11.** Top 10-ranked QSAR model reports without validation set for *Plasmopara viticola*.

b)

| Training Set |                | Test Set |                |
|--------------|----------------|----------|----------------|
| S.D.         | R <sup>2</sup> | RMSE     | Q <sup>2</sup> |
| 1.5607       | 0.7489         | 1.6354   | 0.7269         |

Optimum number of factors = 1

| ID Set   | Y(Obs)  | Y(Pred) | Error   | Name             |
|----------|---------|---------|---------|------------------|
| 1 train  | 0.0000  | -0.5844 | -0.5844 | Azoxystrobin     |
| 2 train  | -6.1770 | -3.4788 | 2.6982  | Coumoxystrobin   |
| 3 test   | 0.0000  | -2.8770 | -2.8770 | Enoxastrobin     |
| 4 train  | -6.3730 | -5.7930 | 0.5800  | Fenamidone       |
| 5 train  | -7.4660 | -4.4231 | 3.0429  | Fenaminstrobin   |
| 6 train  | 0.0000  | -0.6105 | -0.6105 | Fluoxastrobin    |
| 7 train  | 0.0000  | -2.2474 | -2.2474 | Metyltetraprole  |
| 8 train  | 0.0000  | -1.7294 | -1.7294 | Oryastrobin      |
| 9 test   | 0.0000  | -2.2333 | -2.2333 | Picoxystrobin    |
| 10 test  | 0.0000  | -0.7546 | -0.7546 | Pyraclastrobin   |
| 11 train | 0.0000  | 0.5119  | 0.5119  | pyrametostrobin  |
| 12 train | 0.0000  | 0.1642  | 0.1642  | Pyraoxystrobin   |
| 13 train | -5.8440 | -4.8203 | 1.0237  | Pyribencarb      |
| 14 train | 0.0000  | -1.0233 | -1.0233 | Triclopyricarb   |
| 15 train | 0.0000  | -3.6030 | -3.6030 | Captan           |
| 16 test  | -3.0380 | -3.7681 | -0.7301 | Ferbam           |
| 17 test  | -5.8910 | -4.3530 | 1.5380  | Folpet           |
| 18 train | -1.8780 | -2.6717 | -0.7937 | Mancozeb         |
| 19 train | -4.2850 | -3.6894 | 0.5956  | Thiram           |
| 20 train | -2.4080 | -2.6717 | -0.2637 | Zineb            |
| 21 test  | -6.5560 | -6.0276 | 0.5284  | Zoxamide         |
| 22 train | -6.5160 | -5.9017 | 0.6143  | Sedaxane         |
| 23 train | -6.8510 | -7.9132 | -1.0622 | Piperalin        |
| 24 train | -6.4860 | -7.1236 | -0.6376 | Inpyrfluxam      |
| 25 train | -7.2910 | -8.1414 | -0.8504 | Penconazole      |
| 26 test  | -6.4640 | -4.2112 | 2.2528  | Ferimzone        |
| 27 test  | -7.5040 | -6.3544 | 1.1496  | Cyflufenamid     |
| 28 train | -6.5290 | -5.8069 | 0.7221  | Diclomezine      |
| 29 train | -6.4320 | -4.6564 | 1.7756  | Dichlobentiazox  |
| 30 train | -6.2790 | -4.2969 | 1.9821  | Flufenoxystrobin |
| 31 train | -7.2240 | -7.1865 | 0.0375  | Azaconazole      |
| 32 train | -6.1090 | -7.5367 | -1.4277 | Fenoxanil        |
| 33 train | -7.2400 | -6.3321 | 0.9079  | Iprodione        |
| 34 test  | -7.2910 | -6.4770 | 0.8140  | Penthiopyrad     |
| 35 train | -6.6800 | -8.2834 | -1.6034 | Oxathiapiprolin  |
| 36 train | -5.0670 | -3.2863 | 1.7807  | Metominostrobin  |

c)

| Training Set |                | Test Set |                |
|--------------|----------------|----------|----------------|
| S.D.         | R <sup>2</sup> | RMSE     | Q <sup>2</sup> |
| 1.4173       | 0.7931         | 1.6099   | 0.7343         |

Optimum number of factors = 1

| ID Set   | Y(Obs)  | Y(Pred) | Error   | Name             |
|----------|---------|---------|---------|------------------|
| 1 train  | 0.0000  | -0.7339 | -0.7339 | Azoxystrobin     |
| 2 train  | -6.1770 | -4.4838 | 1.6932  | Coumoxystrobin   |
| 3 test   | 0.0000  | -2.1268 | -2.1268 | Enoxastrobin     |
| 4 test   | -6.3730 | -4.1793 | 2.1937  | Fenamidone       |
| 5 train  | -7.4660 | -4.8284 | 2.6376  | Fenaminstrobin   |
| 6 train  | 0.0000  | -1.2089 | -1.2089 | Fluoxastrobin    |
| 7 train  | 0.0000  | -0.4627 | -0.4627 | Metyltetraprole  |
| 8 train  | 0.0000  | -2.2218 | -2.2218 | Oryastrobin      |
| 9 test   | 0.0000  | -1.8150 | -1.8150 | Picoxystrobin    |
| 10 train | 0.0000  | 1.1313  | 1.1313  | Pyraclastrobin   |
| 11 test  | 0.0000  | -1.5249 | -1.5249 | pyrametostrobin  |
| 12 train | 0.0000  | -0.0475 | -0.0475 | Pyraoxystrobin   |
| 13 train | -5.8440 | -5.2417 | 0.6023  | Pyribencarb      |
| 14 train | 0.0000  | -0.7802 | -0.7802 | Triclopyricarb   |
| 15 train | 0.0000  | -2.9325 | -2.9325 | Captan           |
| 16 train | -3.0380 | -2.8959 | 0.1421  | Ferbam           |
| 17 train | -5.8910 | -4.2676 | 1.6234  | Folpet           |
| 18 train | -1.8780 | -2.8687 | -0.9907 | Mancozeb         |
| 19 train | -4.2850 | -3.1050 | 1.1800  | Thiram           |
| 20 train | -2.4080 | -2.8687 | -0.4607 | Zineb            |
| 21 train | -6.5560 | -8.3395 | -1.7835 | Zoxamide         |
| 22 train | -6.5160 | -6.3522 | 0.1638  | Sedaxane         |
| 23 train | -6.8510 | -7.6051 | -0.7541 | Piperalin        |
| 24 train | -6.4860 | -7.7373 | -1.2513 | Inpyrfluxam      |
| 25 train | -7.2910 | -8.1507 | -0.8597 | Penconazole      |
| 26 train | -6.4640 | -5.1089 | 1.3551  | Ferimzone        |
| 27 test  | -7.5040 | -5.8253 | 1.6787  | Cyflufenamid     |
| 28 test  | -6.5290 | -6.0916 | 0.4374  | Diclomezine      |
| 29 train | -6.4320 | -4.5006 | 1.9314  | Dichlobentiazox  |
| 30 train | -6.2790 | -4.6304 | 1.6486  | Flufenoxystrobin |
| 31 train | -7.2240 | -7.6823 | -0.4583 | Azaconazole      |
| 32 test  | -6.1090 | -5.8568 | 0.2522  | Fenoxanil        |
| 33 train | -7.2400 | -5.7677 | 1.4723  | Iprodione        |
| 34 test  | -7.2910 | -6.3812 | 0.9098  | Penthiopyrad     |
| 35 train | -6.6800 | -7.3150 | -0.6350 | Oxathiapiprolin  |
| 36 test  | -5.0670 | -2.9524 | 2.1146  | Metominostrobin  |

d)

| Training Set |                | Test Set |                |
|--------------|----------------|----------|----------------|
| S.D.         | R <sup>2</sup> | RMSE     | Q <sup>2</sup> |
| 1.5606       | 0.7491         | 1.6732   | 0.7130         |

Optimum number of factors = 1

| ID Set   | Y(Obs)  | Y(Pred) | Error   | Name             |
|----------|---------|---------|---------|------------------|
| 1 train  | 0.0000  | -0.8496 | -0.8496 | Azoxystrobin     |
| 2 train  | -6.1770 | -3.5091 | 2.6679  | Coumoxystrobin   |
| 3 test   | 0.0000  | -2.1784 | -2.1784 | Enoxastrobin     |
| 4 test   | -6.3730 | -4.6175 | 1.7555  | Fenamidone       |
| 5 train  | -7.4660 | -4.5114 | 2.9546  | Fenaminstrobin   |
| 6 train  | 0.0000  | -1.0117 | -1.0117 | Fluoxastrobin    |
| 7 train  | 0.0000  | -1.1525 | -1.1525 | Metyltetraprole  |
| 8 train  | 0.0000  | -1.8835 | -1.8835 | Oryastrobin      |
| 9 test   | 0.0000  | -2.4794 | -2.4794 | Picoxystrobin    |
| 10 train | 0.0000  | 0.9881  | 0.9881  | Pyraclastrobin   |
| 11 test  | 0.0000  | -0.8767 | -0.8767 | pyrametostrobin  |
| 12 train | 0.0000  | -0.5614 | -0.5614 | Pyraoxystrobin   |
| 13 train | -5.8440 | -5.7118 | 0.1322  | Pyribencarb      |
| 14 train | 0.0000  | -0.9616 | -0.9616 | Triclopyricarb   |
| 15 train | 0.0000  | -3.5025 | -3.5025 | Captan           |
| 16 train | -3.0380 | -3.1369 | -0.0989 | Ferbam           |
| 17 train | -5.8910 | -4.5472 | 1.3438  | Folpet           |
| 18 train | -1.8780 | -2.5501 | -0.6721 | Mancozeb         |
| 19 train | -4.2850 | -3.4991 | 0.7859  | Thiram           |
| 20 train | -2.4080 | -2.5501 | -0.1421 | Zineb            |
| 21 train | -6.5560 | -7.6263 | -1.0703 | Zoxamide         |
| 22 train | -6.5160 | -5.9241 | 0.5919  | Sedaxane         |
| 23 train | -6.8510 | -8.4378 | -1.5868 | Piperalin        |
| 24 train | -6.4860 | -7.2996 | -0.8136 | Inpyrfluxam      |
| 25 train | -7.2910 | -7.6751 | -0.3841 | Penconazole      |
| 26 train | -6.4640 | -5.3358 | 1.1282  | Ferimzone        |
| 27 test  | -7.5040 | -6.8313 | 0.6727  | Cyflufenamid     |
| 28 test  | -6.5290 | -5.2323 | 1.2967  | Diclomezine      |
| 29 train | -6.4320 | -4.7903 | 1.6417  | Dichlobentiazox  |
| 30 train | -6.2790 | -3.7493 | 2.5297  | Flufenoxystrobin |
| 31 train | -7.2240 | -6.4769 | 0.7471  | Azaconazole      |
| 32 test  | -6.1090 | -6.1862 | -0.0772 | Fenoxanil        |
| 33 train | -7.2400 | -6.0813 | 1.1587  | Iprodione        |
| 34 test  | -7.2910 | -6.6695 | 0.6215  | Penthiopyrad     |
| 35 train | -6.6800 | -8.6592 | -1.9792 | Oxathiapiprolin  |
| 36 test  | -5.0670 | -2.2455 | 2.8215  | Metominostrobin  |

e)

| Training Set |                | Test Set |                |
|--------------|----------------|----------|----------------|
| S.D.         | R <sup>2</sup> | RMSE     | Q <sup>2</sup> |
| 1.9451       | 0.6333         | 1.7702   | 0.6594         |

Optimum number of factors = 2

| ID Set   | Y(Obs)  | Y(Pred) | Error   | Name             |
|----------|---------|---------|---------|------------------|
| 1 test   | 0.0000  | -1.1991 | -1.1991 | Azoxystrobin     |
| 2 train  | -6.1770 | -3.5475 | 2.6295  | Coumoxystrobin   |
| 3 train  | 0.0000  | -0.3819 | -0.3819 | Enoxastrobin     |
| 4 train  | -6.3730 | -5.5131 | 0.8599  | Fenamidone       |
| 5 train  | -7.4660 | -2.5173 | 4.9487  | Fenaminstrobin   |
| 6 train  | 0.0000  | 0.5590  | 0.5590  | Fluoxastrobin    |
| 7 test   | 0.0000  | -2.3849 | -2.3849 | Metyltetraprole  |
| 8 train  | 0.0000  | -1.7280 | -1.7280 | Oryastrobin      |
| 9 train  | 0.0000  | -2.9018 | -2.9018 | Picoxystrobin    |
| 10 train | 0.0000  | -1.7005 | -1.7005 | Pyraclastrobin   |
| 11 test  | 0.0000  | -2.7162 | -2.7162 | pyrametostrobin  |
| 12 train | 0.0000  | -1.4375 | -1.4375 | Pyraoxystrobin   |
| 13 test  | -5.8440 | -4.0998 | 1.7442  | Pyribencarb      |
| 14 train | 0.0000  | -0.8362 | -0.8362 | Triclopyricarb   |
| 15 train | 0.0000  | -3.1193 | -3.1193 | Captan           |
| 16 test  | -3.0380 | -1.3272 | 1.7108  | Ferbam           |
| 17 train | -5.8910 | -4.6982 | 1.1928  | Folpet           |
| 18 train | -1.8780 | -2.4618 | -0.5838 | Mancozeb         |
| 19 train | -4.2850 | -4.9067 | -0.6217 | Thiram           |
| 20 train | -2.4080 | -4.1496 | -1.7416 | Zineb            |
| 21 train | -6.5560 | -5.8842 | 0.6718  | Zoxamide         |
| 22 train | -6.5160 | -7.7344 | -1.2184 | Sedaxane         |
| 23 train | -6.8510 | -6.8590 | -0.0080 | Piperalin        |
| 24 train | -6.4860 | -8.5448 | -2.0588 | Inpyrfluxam      |
| 25 train | -7.2910 | -7.1589 | 0.1321  | Penconazole      |
| 26 test  | -6.4640 | -4.7508 | 1.7132  | Ferimzone        |
| 27 train | -7.5040 | -6.0471 | 1.4569  | Cyflufenamid     |
| 28 test  | -6.5290 | -5.9267 | 0.6023  | Diclomezine      |
| 29 train | -6.4320 | -3.3914 | 3.0406  | Dichlobentiazox  |
| 30 train | -6.2790 | -3.4886 | 2.7904  | Flufenoxystrobin |
| 31 train | -7.2240 | -6.9467 | 0.2773  | Azaconazole      |
| 32 train | -6.1090 | -6.8805 | -0.7715 | Fenoxanil        |
| 33 train | -7.2400 | -6.8021 | 0.4379  | Iprodione        |
| 34 test  | -7.2910 | -6.2663 | 1.0247  | Penthiopyrad     |
| 35 test  | -6.6800 | -8.5191 | -1.8391 | Oxathiapiprolin  |
| 36 train | -5.0670 | -4.9548 | 0.1122  | Metominostrobin  |

**Figure S12.** Model reports for a) refer to the main paper, b) *kpls\_radial\_24*, c) *kpls\_linear\_22*, d) *kpls\_radial\_22*, and e) *pls\_2* models of *Plasmopara viticola* without using validation set.

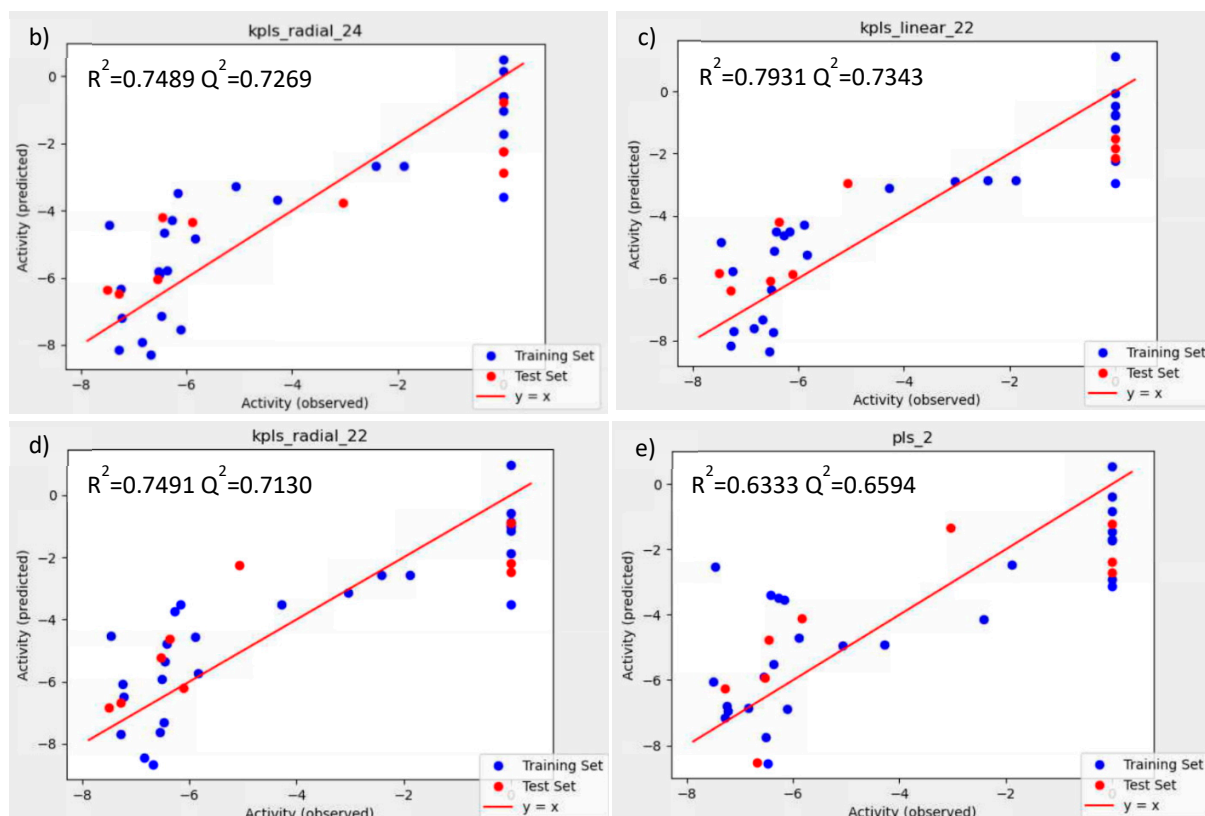

**Figure S13.** Scatter plot about performance for a) refer to the main paper, b) kpls\_radial\_24, c) kpls\_linear\_22, d) kpls\_radial\_22, and e) pls\_2 models of *Plasmodium viticola* without using validation set.

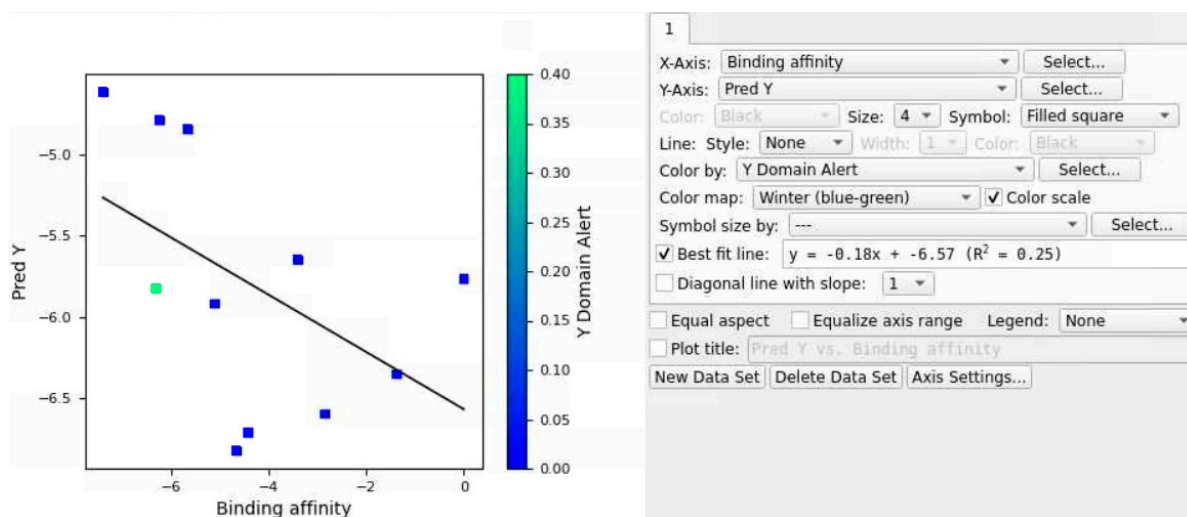

**Figure S14.** Scatter plot of external validation set for all top five models after removing six outliers in Figure 12 (c).



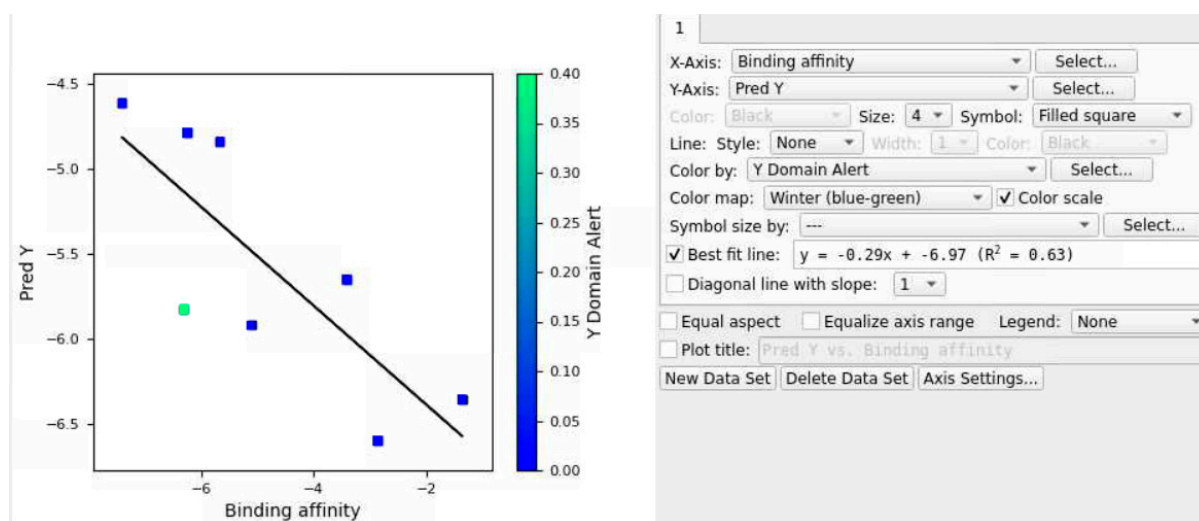

**Figure S15.** Scatter plot of external validation set for all top five models after removing three outliers in Figure S14.

| Model Report      |        |        |                |        |                |                                     |  |
|-------------------|--------|--------|----------------|--------|----------------|-------------------------------------|--|
| Model Code        | Score  | S.D.   | R <sup>2</sup> | RMSE   | Q <sup>2</sup> | Q <sup>2</sup> MW (Null Hypothesis) |  |
| kpls_linear_39    | 0.7733 | 1.4315 | 0.7953         | 1.4160 | 0.7624         | 0.1066                              |  |
| kpls_desc_31      | 0.7705 | 1.5857 | 0.7659         | 1.4005 | 0.7614         | -0.3689                             |  |
| kpls_dendritic_39 | 0.7704 | 1.3903 | 0.8069         | 1.4045 | 0.7662         | 0.1066                              |  |
| kpls_linear_2     | 0.7680 | 1.3868 | 0.8058         | 1.4107 | 0.7885         | 0.1942                              |  |
| kpls_linear_31    | 0.7632 | 1.5812 | 0.7571         | 1.4079 | 0.7589         | -0.3689                             |  |
| kpls_dendritic_31 | 0.7622 | 1.5533 | 0.7656         | 1.4777 | 0.7344         | -0.3689                             |  |
| kpls_radial_31    | 0.7372 | 1.6622 | 0.7316         | 1.5053 | 0.7244         | -0.3689                             |  |
| pls_31            | 0.7325 | 1.7211 | 0.7242         | 1.4936 | 0.7286         | -0.3689                             |  |
| kpls_desc_2       | 0.6927 | 1.7091 | 0.7173         | 1.6569 | 0.7083         | 0.1942                              |  |
| pls_2             | 0.6753 | 1.8580 | 0.6658         | 1.6730 | 0.7025         | 0.1942                              |  |

**Figure S16.** Top 10-ranked QSAR model reports with validation set for *Plasmopara viticola*.

| b) Training Set               |                |         |         |                  | Test Set |                |         |         |                  |
|-------------------------------|----------------|---------|---------|------------------|----------|----------------|---------|---------|------------------|
| S.D.                          | R <sup>2</sup> |         |         |                  | RMSE     | Q <sup>2</sup> |         |         |                  |
| 1.5857                        | 0.7659         |         |         |                  | 1.4005   | 0.7614         |         |         |                  |
| Optimum number of factors = 2 |                |         |         |                  |          |                |         |         |                  |
| ID Set                        | Y(Obs)         | Y(Pred) | Error   | Name             | ID Set   | Y(Obs)         | Y(Pred) | Error   | Name             |
| 1 train                       | 0.0000         | -0.0223 | -0.0223 | Azoxystrobin     | 1 test   | 0.0000         | -2.4017 | -2.4017 | Azoxystrobin     |
| 2 train                       | -6.1770        | -2.8913 | 3.2857  | Coumoxystrobin   | 2 train  | -6.1770        | -3.8256 | 2.3514  | Coumoxystrobin   |
| 3 test                        | 0.0000         | 0.1754  | 0.1754  | Enoxastrobin     | 3 train  | 0.0000         | 0.1218  | 0.1218  | Enoxastrobin     |
| 4 train                       | 0.0000         | 0.7086  | 0.7086  | Fluoxastrobin    | 4 train  | 0.0000         | -1.6422 | -1.6422 | Fluoxastrobin    |
| 5 train                       | 0.0000         | 0.3846  | 0.3846  | Metiltetraprole  | 5 train  | 0.0000         | -0.2450 | -0.2450 | Metiltetraprole  |
| 6 train                       | 0.0000         | -0.9345 | -0.9345 | Orysastrobin     | 6 train  | 0.0000         | -1.3003 | -1.3003 | Orysastrobin     |
| 7 train                       | 0.0000         | -3.2886 | -3.2886 | Picoxystrobin    | 7 train  | 0.0000         | -0.2010 | -0.2010 | Picoxystrobin    |
| 8 train                       | 0.0000         | -0.9671 | -0.9671 | Pyraclastrobin   | 8 train  | 0.0000         | 1.3493  | 1.3493  | Pyraclastrobin   |
| 9 train                       | 0.0000         | -2.0821 | -2.0821 | pyrametostrobin  | 9 test   | 0.0000         | -1.5057 | -1.5057 | pyrametostrobin  |
| 10 train                      | 0.0000         | -0.9167 | -0.9167 | Pyraoxystrobin   | 10 train | 0.0000         | 0.1005  | 0.1005  | Pyraoxystrobin   |
| 11 test                       | -5.8440        | -4.0786 | 1.7654  | Pyribencarb      | 11 train | -5.8440        | -4.6705 | 1.1735  | Pyribencarb      |
| 12 test                       | 0.0000         | -2.0481 | -2.0481 | Triclopyricarb   | 12 train | 0.0000         | -0.8057 | -0.8057 | Triclopyricarb   |
| 13 train                      | 0.0000         | -1.8613 | -1.8613 | Captan           | 13 train | 0.0000         | -3.3248 | -3.3248 | Captan           |
| 14 train                      | -3.0380        | -2.2697 | 0.7683  | Ferbam           | 14 train | -3.0380        | -3.5084 | -0.4704 | Ferbam           |
| 15 train                      | -5.8910        | -4.3970 | 1.4940  | Folpet           | 15 train | -5.8910        | -4.5728 | 1.3182  | Folpet           |
| 16 train                      | -1.8780        | -2.6440 | -0.7660 | Mancozeb         | 16 train | -1.8780        | -3.4164 | -1.5384 | Mancozeb         |
| 17 train                      | -4.2850        | -4.1806 | 0.1044  | Thiram           | 17 test  | -4.2850        | -3.6047 | 0.6803  | Thiram           |
| 18 test                       | -2.4080        | -4.8237 | -2.4157 | Zineb            | 18 train | -2.4080        | -3.4164 | -1.0084 | Zineb            |
| 19 train                      | -6.5560        | -6.3244 | 0.2316  | Zoxamide         | 19 train | -6.5560        | -7.8953 | -1.3393 | Zoxamide         |
| 20 train                      | -6.5160        | -8.1444 | -1.6284 | Sedaxane         | 20 test  | -6.5160        | -5.6900 | 0.8260  | Sedaxane         |
| 21 train                      | -6.8510        | -7.1294 | -0.2784 | Piperalin        | 21 train | -6.8510        | -7.4287 | -0.5777 | Piperalin        |
| 22 train                      | -6.4860        | -8.6045 | -2.1185 | Inpyrfluxam      | 22 train | -6.4860        | -7.5701 | -1.0841 | Inpyrfluxam      |
| 23 train                      | -7.2910        | -6.9206 | 0.3704  | Penconazole      | 23 test  | -7.2910        | -6.4012 | 0.8898  | Penconazole      |
| 24 train                      | -6.4640        | -6.0181 | 0.4459  | Ferimzone        | 24 train | -6.4640        | -5.2502 | 1.2138  | Ferimzone        |
| 25 train                      | -7.5040        | -7.0410 | 0.4630  | Cyflufenamid     | 25 test  | -7.5040        | -5.1255 | 2.3785  | Cyflufenamid     |
| 26 test                       | -6.5290        | -6.3066 | 0.2224  | Diclomazine      | 26 test  | -6.5290        | -6.1485 | 0.3805  | Diclomazine      |
| 27 train                      | -6.4320        | -3.8631 | 2.5689  | Dichlobentiazox  | 27 train | -6.4320        | -4.6016 | 1.8304  | Dichlobentiazox  |
| 28 train                      | -6.2790        | -3.8005 | 2.4785  | Flufenoxystrobin | 28 train | -6.2790        | -4.4093 | 1.8697  | Flufenoxystrobin |
| 29 train                      | -7.2240        | -6.7431 | 0.4809  | Azaconazole      | 29 train | -7.2240        | -7.2565 | -0.0325 | Azaconazole      |
| 30 test                       | -6.1090        | -6.3899 | -0.2809 | Fenoxanil        | 30 test  | -6.1090        | -6.0332 | 0.0758  | Fenoxanil        |
| 31 train                      | -7.2400        | -6.2985 | 0.9415  | Iprodione        | 31 train | -7.2400        | -6.0561 | 1.1839  | Iprodione        |
| 32 test                       | -7.2910        | -5.8168 | 1.4742  | Penthiopyrad     | 32 train | -7.2910        | -7.7458 | -0.4548 | Penthiopyrad     |
| 33 test                       | -6.6800        | -7.1401 | -0.4601 | Oxathiapiprolin  | 33 train | -6.6800        | -6.8544 | -0.1744 | Oxathiapiprolin  |
| 34 train                      | -5.0670        | -4.9292 | 0.1378  | Metominostrobin  | 34 train | -5.0670        | -3.3804 | 1.6866  | Metominostrobin  |

  

| c) Training Set               |                |         |         |                  | Test Set |                |         |         |                  |
|-------------------------------|----------------|---------|---------|------------------|----------|----------------|---------|---------|------------------|
| S.D.                          | R <sup>2</sup> |         |         |                  | RMSE     | Q <sup>2</sup> |         |         |                  |
| 1.3903                        | 0.8069         |         |         |                  | 1.4045   | 0.7662         |         |         |                  |
| Optimum number of factors = 1 |                |         |         |                  |          |                |         |         |                  |
| ID Set                        | Y(Obs)         | Y(Pred) | Error   | Name             | ID Set   | Y(Obs)         | Y(Pred) | Error   | Name             |
| 1 test                        | 0.0000         | -2.4017 | -2.4017 | Azoxystrobin     | 1 train  | 0.0000         | -0.7023 | -0.7023 | Azoxystrobin     |
| 2 train                       | -6.1770        | -3.8256 | 2.3514  | Coumoxystrobin   | 2 train  | -6.1770        | -4.0529 | 2.1241  | Coumoxystrobin   |
| 3 train                       | 0.0000         | 0.1218  | 0.1218  | Enoxastrobin     | 3 test   | 0.0000         | -1.3660 | -1.3660 | Enoxastrobin     |
| 4 train                       | 0.0000         | -1.6422 | -1.6422 | Fluoxastrobin    | 4 train  | 0.0000         | -1.1355 | -1.1355 | Fluoxastrobin    |
| 5 train                       | 0.0000         | -0.2450 | -0.2450 | Metiltetraprole  | 5 train  | 0.0000         | -0.8193 | -0.8193 | Metiltetraprole  |
| 6 train                       | 0.0000         | -1.3003 | -1.3003 | Orysastrobin     | 6 train  | 0.0000         | -1.9540 | -1.9540 | Orysastrobin     |
| 7 train                       | 0.0000         | -0.2010 | -0.2010 | Picoxystrobin    | 7 train  | 0.0000         | 0.0689  | 0.0689  | Picoxystrobin    |
| 8 train                       | 0.0000         | 1.3493  | 1.3493  | Pyraclastrobin   | 8 train  | 0.0000         | 0.5797  | 0.5797  | Pyraclastrobin   |
| 9 test                        | 0.0000         | -1.5057 | -1.5057 | pyrametostrobin  | 9 train  | 0.0000         | -0.4633 | -0.4633 | pyrametostrobin  |
| 10 train                      | 0.0000         | 0.1005  | 0.1005  | Pyraoxystrobin   | 10 train | 0.0000         | 0.3089  | 0.3089  | Pyraoxystrobin   |
| 11 train                      | -5.8440        | -4.6705 | 1.1735  | Pyribencarb      | 11 test  | -5.8440        | -3.7030 | 2.1410  | Pyribencarb      |
| 12 train                      | 0.0000         | -0.8057 | -0.8057 | Triclopyricarb   | 12 test  | 0.0000         | -1.7012 | -1.7012 | Triclopyricarb   |
| 13 train                      | 0.0000         | -3.3248 | -3.3248 | Captan           | 13 train | 0.0000         | -3.9677 | -3.9677 | Captan           |
| 14 train                      | -3.0380        | -3.5084 | -0.4704 | Ferbam           | 14 train | -3.0380        | -3.9369 | -0.8989 | Ferbam           |
| 15 train                      | -5.8910        | -4.5728 | 1.3182  | Folpet           | 15 train | -5.8910        | -4.5429 | 1.3481  | Folpet           |
| 16 train                      | -1.8780        | -3.4164 | -1.5384 | Mancozeb         | 16 train | -1.8780        | -4.1376 | -2.2596 | Mancozeb         |
| 17 test                       | -4.2850        | -3.6047 | 0.6803  | Thiram           | 17 train | -4.2850        | -4.1001 | 0.1849  | Thiram           |
| 18 train                      | -2.4080        | -3.4164 | -1.0084 | Zineb            | 18 test  | -2.4080        | -4.1376 | -1.7296 | Zineb            |
| 19 train                      | -6.5560        | -7.8953 | -1.3393 | Zoxamide         | 19 train | -6.5560        | -7.6134 | -1.0574 | Zoxamide         |
| 20 test                       | -6.5160        | -5.6900 | 0.8260  | Sedaxane         | 20 train | -6.5160        | -6.3305 | 0.1855  | Sedaxane         |
| 21 train                      | -6.8510        | -7.4287 | -0.5777 | Piperalin        | 21 train | -6.8510        | -7.2062 | -0.3552 | Piperalin        |
| 22 train                      | -6.4860        | -7.5701 | -1.0841 | Inpyrfluxam      | 22 train | -6.4860        | -6.9609 | -0.4749 | Inpyrfluxam      |
| 23 test                       | -7.2910        | -6.4012 | 0.8898  | Penconazole      | 23 train | -7.2910        | -8.1309 | -0.8399 | Penconazole      |
| 24 train                      | -6.4640        | -5.2502 | 1.2138  | Ferimzone        | 24 train | -6.4640        | -4.2480 | 2.2160  | Ferimzone        |
| 25 test                       | -7.5040        | -5.1255 | 2.3785  | Cyflufenamid     | 25 train | -7.5040        | -7.3227 | 0.1813  | Cyflufenamid     |
| 26 test                       | -6.5290        | -6.1485 | 0.3805  | Diclomazine      | 26 test  | -6.5290        | -5.7559 | 0.7731  | Diclomazine      |
| 27 train                      | -6.4320        | -4.6016 | 1.8304  | Dichlobentiazox  | 27 train | -6.4320        | -4.0391 | 2.3929  | Dichlobentiazox  |
| 28 train                      | -6.2790        | -4.4093 | 1.8697  | Flufenoxystrobin | 28 train | -6.2790        | -3.9048 | 2.3742  | Flufenoxystrobin |
| 29 train                      | -7.2240        | -7.2565 | -0.0325 | Azaconazole      | 29 train | -7.2240        | -7.6264 | -0.4024 | Azaconazole      |
| 30 test                       | -6.1090        | -6.0332 | 0.0758  | Fenoxanil        | 30 test  | -6.1090        | -6.2949 | -0.1859 | Fenoxanil        |
| 31 train                      | -7.2400        | -6.0561 | 1.1839  | Iprodione        | 31 train | -7.2400        | -6.1569 | 1.0831  | Iprodione        |
| 32 train                      | -7.2910        | -7.7458 | -0.4548 | Penthiopyrad     | 32 test  | -7.2910        | -6.3324 | 0.9586  | Penthiopyrad     |
| 33 train                      | -6.6800        | -6.8544 | -0.1744 | Oxathiapiprolin  | 33 test  | -6.6800        | -5.2757 | 1.4043  | Oxathiapiprolin  |
| 34 train                      | -5.0670        | -3.3804 | 1.6866  | Metominostrobin  | 34 train | -5.0670        | -2.7843 | 2.2827  | Metominostrobin  |

  

| d) Training Set               |                |         |         |                  | Test Set |                |         |         |                  |
|-------------------------------|----------------|---------|---------|------------------|----------|----------------|---------|---------|------------------|
| S.D.                          | R <sup>2</sup> |         |         |                  | RMSE     | Q <sup>2</sup> |         |         |                  |
| 1.3868                        | 0.8058         |         |         |                  | 1.4107   | 0.7885         |         |         |                  |
| Optimum number of factors = 1 |                |         |         |                  |          |                |         |         |                  |
| ID Set                        | Y(Obs)         | Y(Pred) | Error   | Name             | ID Set   | Y(Obs)         | Y(Pred) | Error   | Name             |
| 1 test                        | 0.0000         | -2.3820 | -2.3820 | Azoxystrobin     | 1 train  | 0.0000         | -0.7023 | -0.7023 | Azoxystrobin     |
| 2 train                       | -6.1770        | -3.6406 | 2.5364  | Coumoxystrobin   | 2 train  | -6.1770        | -4.0529 | 2.1241  | Coumoxystrobin   |
| 3 train                       | 0.0000         | 0.2951  | 0.2951  | Enoxastrobin     | 3 test   | 0.0000         | -1.3660 | -1.3660 | Enoxastrobin     |
| 4 train                       | 0.0000         | -1.3615 | -1.3615 | Fluoxastrobin    | 4 train  | 0.0000         | -1.1355 | -1.1355 | Fluoxastrobin    |
| 5 train                       | 0.0000         | -1.2162 | -1.2162 | Metiltetraprole  | 5 train  | 0.0000         | -0.8193 | -0.8193 | Metiltetraprole  |
| 6 train                       | 0.0000         | -0.5476 | -0.5476 | Orysastrobin     | 6 train  | 0.0000         | -1.9540 | -1.9540 | Orysastrobin     |
| 7 train                       | 0.0000         | -0.2526 | -0.2526 | Picoxystrobin    | 7 train  | 0.0000         | 0.0689  | 0.0689  | Picoxystrobin    |
| 8 test                        | 0.0000         | -0.4025 | -0.4025 | Pyraclastrobin   | 8 train  | 0.0000         | 0.5797  | 0.5797  | Pyraclastrobin   |
| 9 train                       | 0.0000         | -0.1326 | -0.1326 | pyrametostrobin  | 9 train  | 0.0000         | -0.4633 | -0.4633 | pyrametostrobin  |
| 10 train                      | 0.0000         | 0.6205  | 0.6205  | Pyraoxystrobin   | 10 train | 0.0000         | 0.3089  | 0.3089  | Pyraoxystrobin   |
| 11 train                      | -5.8440        | -4.7601 | 1.0839  | Pyribencarb      | 11 test  | -5.8440        | -3.7030 | 2.1410  | Pyribencarb      |
| 12 test                       | 0.0000         | -1.8649 | -1.8649 | Triclopyricarb   | 12 test  | 0.0000         | -1.7012 | -1.7012 | Triclopyricarb   |
| 13 train                      | 0.0000         | -3.3026 | -3.3026 | Captan           | 13 train | 0.0000         | -3.9677 | -3.9677 | Captan           |
| 14 test                       | -3.0380        | -3.8695 | -0.8315 | Ferbam           | 14 train | -3.0380        | -3.9369 | -0.8989 | Ferbam           |
| 15 test                       | -5.8910        | -3.6734 | 2.2176  | Folpet           | 15 train | -5.8910        | -4.5429 | 1.3481  | Folpet           |
| 16 train                      | -1.8780        | -3.6541 | -1.7761 | Mancozeb         | 16 train | -1.8780        | -4.1376 | -2.2596 | Mancozeb         |
| 17 train                      | -4.2850        | -3.8044 | 0.4806  | Thiram           | 17 train | -4.2850        | -4.1001 | 0.1849  | Thiram           |
| 18 train                      | -2.4080        | -3.6541 | -1.2461 | Zineb            | 18 test  | -2.4080        | -4.1376 | -1.7296 | Zineb            |
| 19 test                       | -6.5560        | -7.0936 | -0.5376 | Zoxamide         | 19 train | -6.5560        | -7.6134 | -1.0574 | Zoxamide         |
| 20 test                       | -6.5160        | -5.6914 | 0.8246  | Sedaxane         | 20 train | -6.5160        | -6.3305 | 0.1855  | Sedaxane         |
| 21 train                      | -6.8510        | -7.1765 | -0.3255 | Piperalin        | 21 train | -6.8510        | -7.2062 | -0.3552 | Piperalin        |
| 22 train                      | -6.4860        | -7.3919 | -0.9059 | Inpyrfluxam      | 22 train | -6.4860        | -6.9609 | -0.4749 | Inpyrfluxam      |
| 23 test                       | -7.2910        | -7.1210 | 0.1700  | Penconazole      | 23 train | -7.2910        | -8.1309 | -0.8399 | Penconazole      |
| 24 train                      | -6.4640        | -5.0065 | 1.4575  | Ferimzone        | 24 train | -6.4640        | -4.2480 | 2.2160  | Ferimzone        |
| 25 train                      | -7.5040        | -7.2713 | 0.2327  | Cyflufenamid     | 25 train | -7.5040        | -7.3227 | 0.1813  | Cyflufenamid     |
| 26 train                      | -6.5290        | -6.3230 | 0.2060  | Diclomazine      | 26 test  | -6.5290        | -5.7559 | 0.7731  | Diclomazine      |
| 27 train                      | -6.4320        | -4.3922 | 2.0398  | Dichlobentiazox  | 27 train | -6.4320        | -4.0391 | 2.3929  | Dichlobentiazox  |
| 28 train                      | -6.2790        | -4.3666 | 1.9124  | Flufenoxystrobin | 28 train | -6.2790        | -3.9048 | 2.3742  | Flufenoxystrobin |
| 29 train                      | -7.2240        | -7.6193 | -0.3953 | Azaconazole      | 29 train | -7.2240        | -7.6264 | -0.4024 | Azaconazole      |
| 30 train                      | -6.1090        | -7.4680 | -1.3590 | Fenoxanil        | 30 test  | -6.1090        | -6.2949 | -0.1859 | Fenoxanil        |
| 31 train                      | -7.2400        | -6.2636 | 0.9764  | Iprodione        | 31 train | -7.2400        | -6.1569 | 1.0831  | Iprodione        |
| 32 train                      | -7.2910        | -7.7966 | -0.5056 | Penthiopyrad     | 32 test  | -7.2910        | -6.3324 | 0.9586  | Penthiopyrad     |
| 33 train                      | -6.6800        | -7.2093 | -0.5293 | Oxathiapiprolin  | 33 test  | -6.6800        | -5.2757 | 1.4043  | Oxathiapiprolin  |
| 34 train                      | -5.0670        | -3.0523 | 2.0147  | Metominostrobin  | 34 train | -5.0670        | -2.7843 | 2.2827  | Metominostrobin  |

**Figure S17.** Model reports for a) refer to the main paper, b) kpls\_desc\_31, c) kpls\_dendritic\_39, d) kpls\_linear\_2, and e) kpls\_linear\_31 models of *Plasmopara viticola* using validation set.

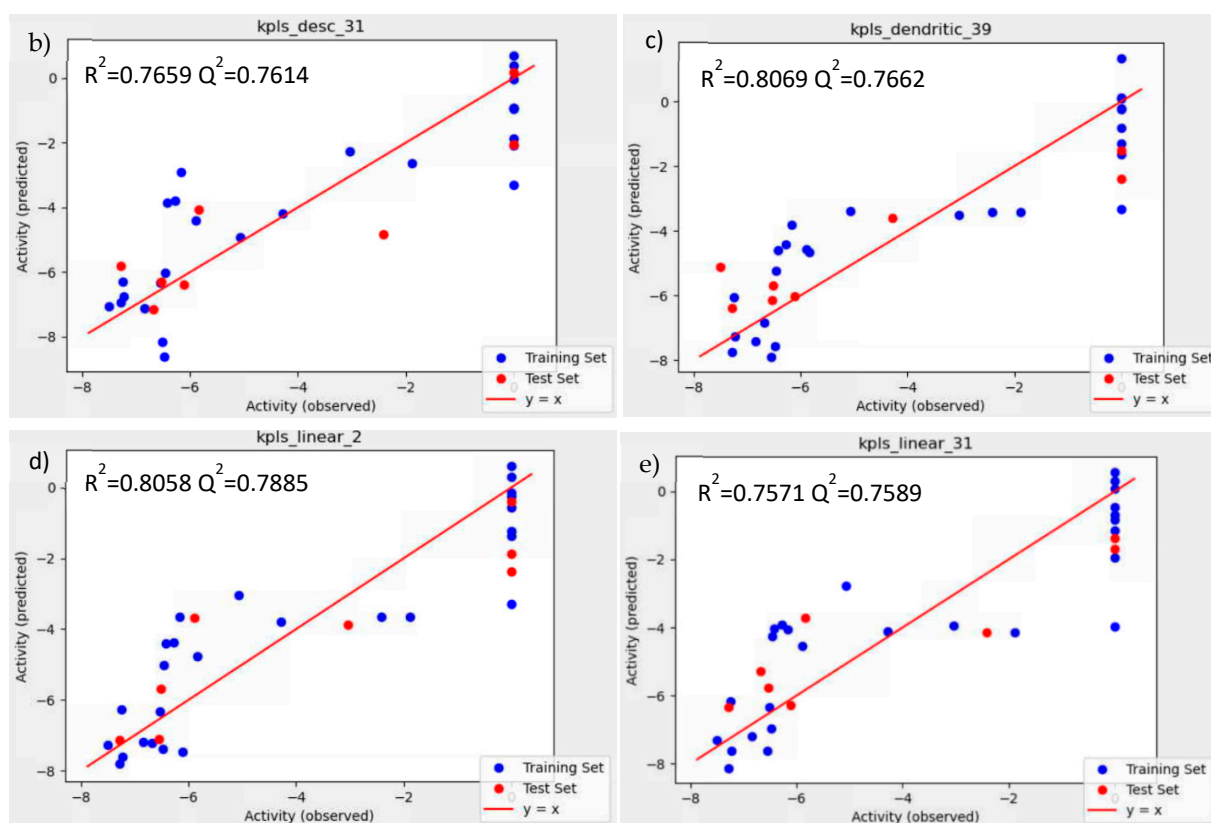

**Figure S18.** Scatter plot about performance for a) refer to the main paper, b) kpls\_desc\_31, c) kpls\_dendritic\_39, d) kpls\_linear\_2, and e) kpls\_linear\_31 models of *Plasmopara viticola* using validation set.

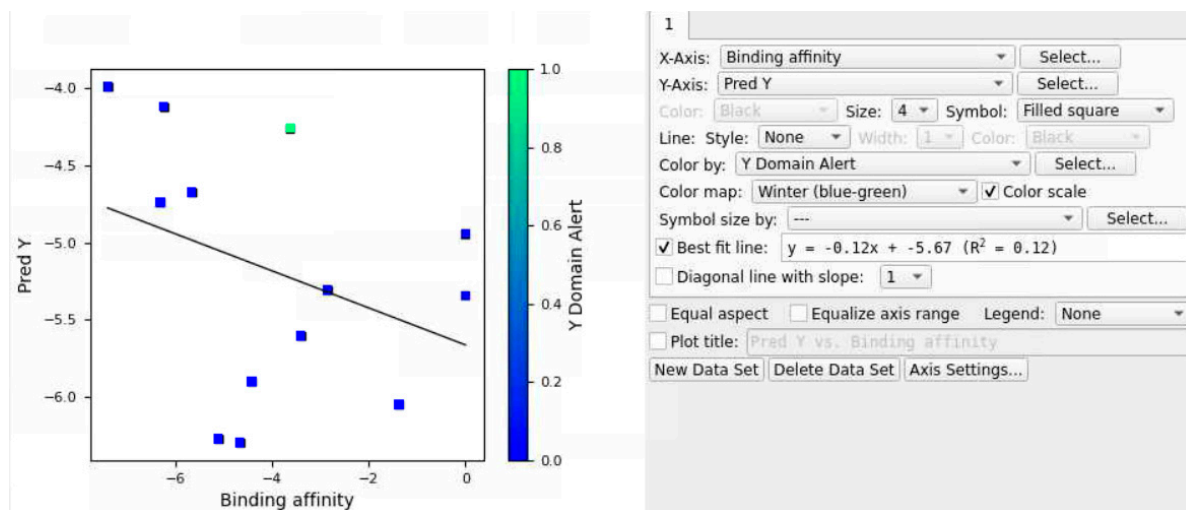

**Figure S19.** Scatter plot of external validation set after removing four outliers in Figure 13 (c).



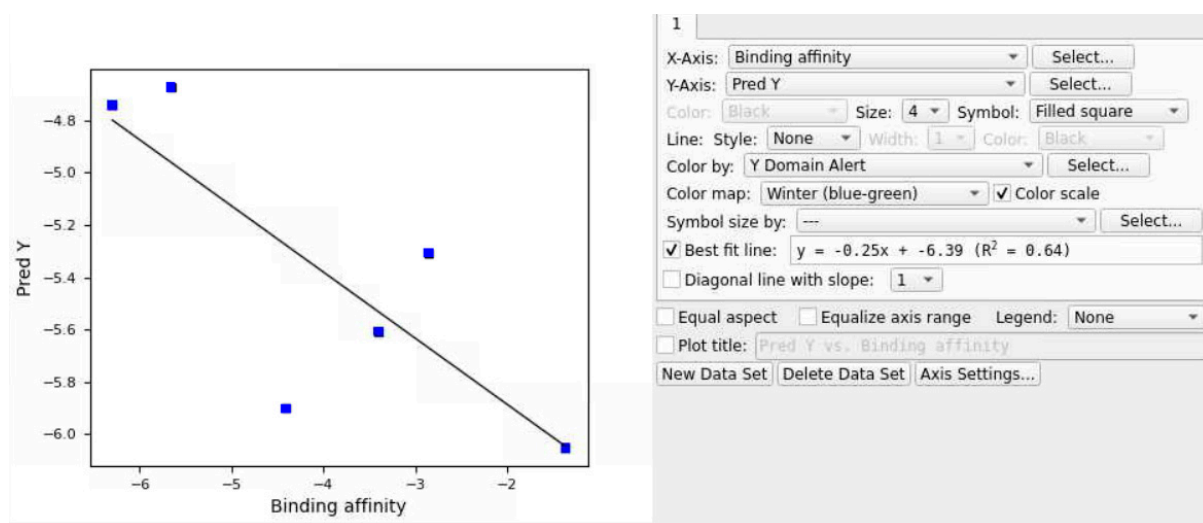

**Figure S20.** Scatter plot of external validation set after removing seven outliers in Figure S19.
